# Supplementary material for: Peaks and pitfalls of electrocatalytic descriptor models at the example of CO2 reduction
Source: Research Square preprint supplement (doi:10.21203/rs.3.rs-5559232/v1), 2025-01-14
Supplement: Supplementary file 1 [file cc06a1bcbd1b99f0f6296b71.docx]

**Supplementary information**

Peaks and pitfalls of electrocatalytic descriptor models at the example of CO2 reduction

Beomil Kim1a, Seungchang Han2a, Suneon Wang1, Stefan Ringe2*, Jihun Oh1,3*

1Department of Materials Science and Engineering, Korea Advanced Institute of Science and Technology, 291 Daehak-ro, Yuseong-gu, Daejeon 34141, Republic of Korea.

2Department of Chemistry, Korea University, Seoul 02841, Republic of Korea

3Institute for Climate Technology and Carbon Neutrality, Korea Advanced Institute of Science and Technology, 291 Daehak-ro, Yuseong-gu, Daejeon 34141, Republic of Korea.

aBeomil Kim and Seungchang Han contributed equally to this work.

*e-mail: sringe@korea.ac.kr, [jihun.oh@kaist.ac.kr](mailto:jihun.oh@kaist.ac.kr)

**Supplementary Figures**


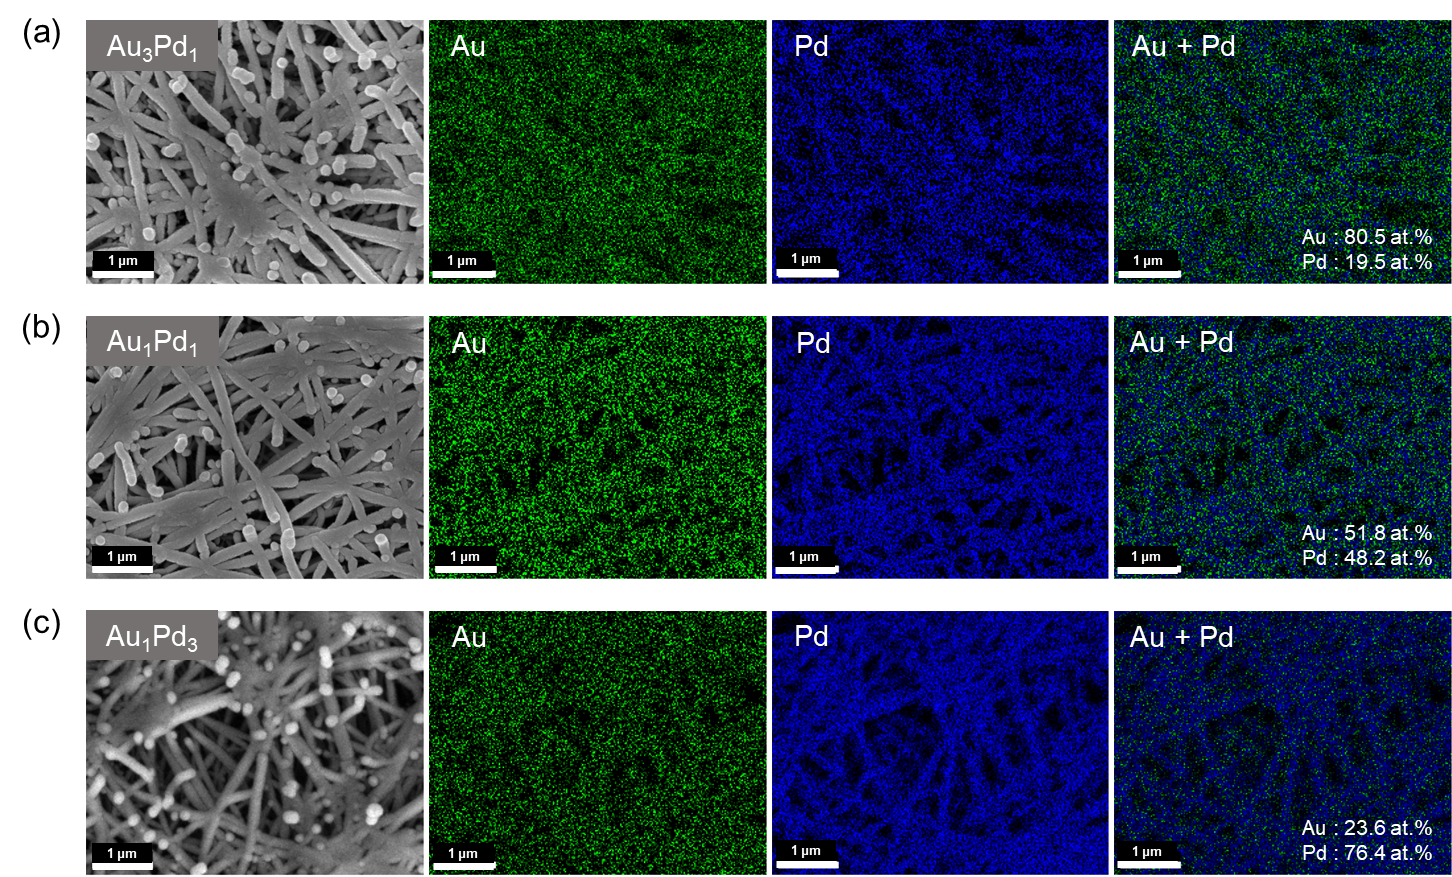


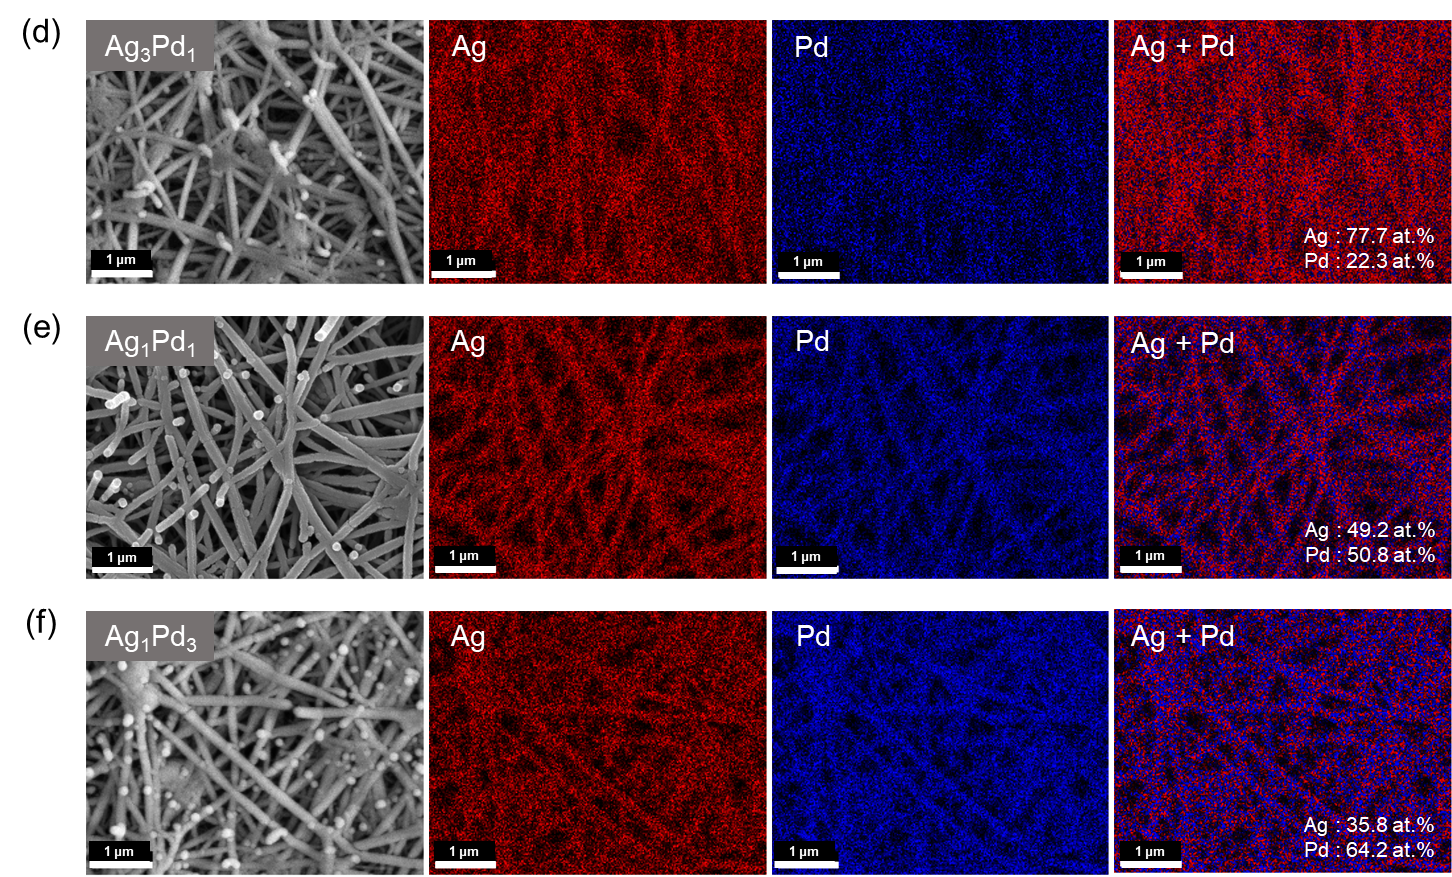


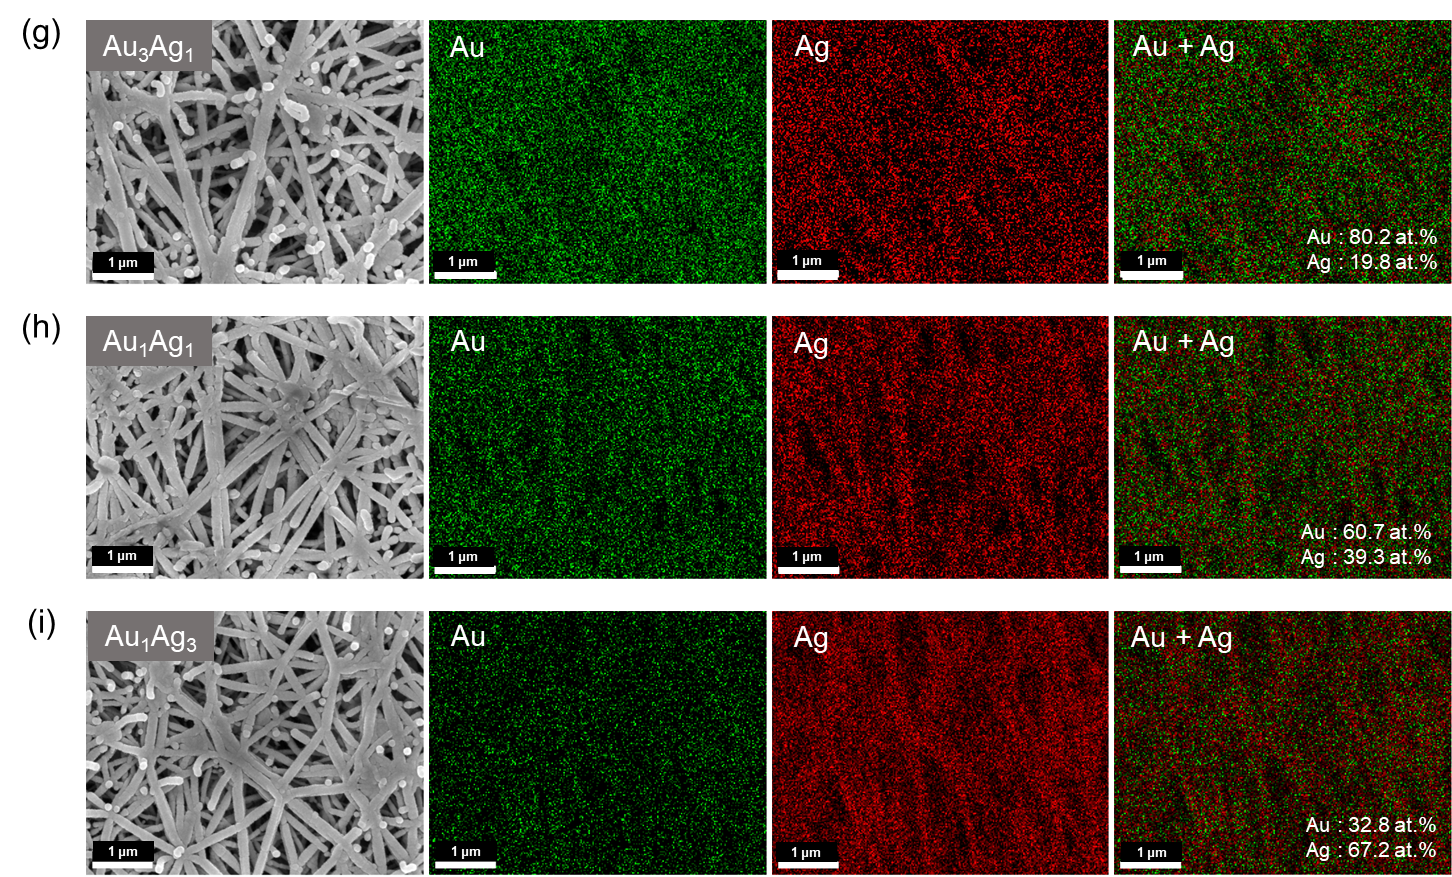


**Supplementary Fig. 1 |** SEM and SEM-EDS images of (a) AuPd alloys, (b) AgPd alloys, and (c) AuAg alloys.

**
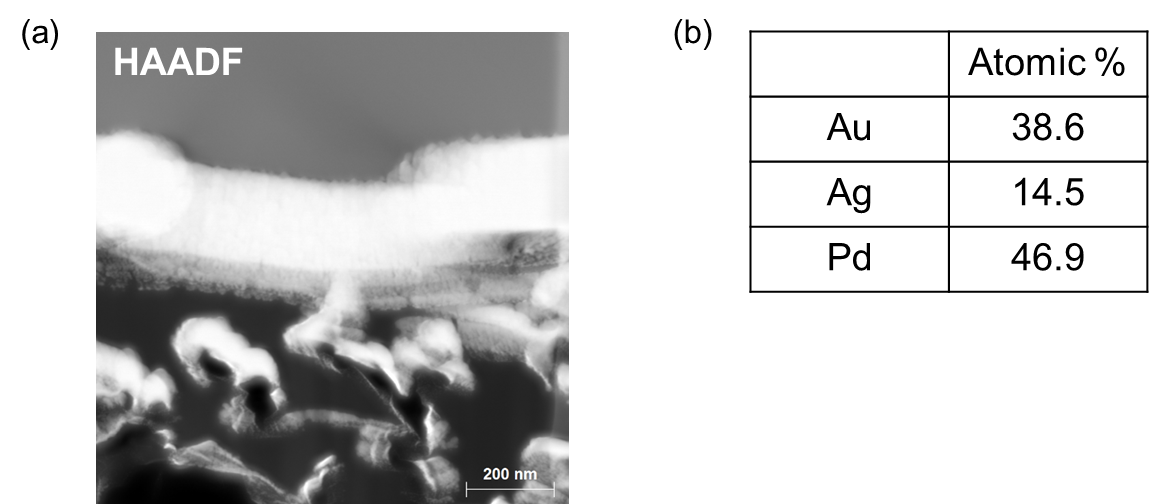
**

**Supplementary Fig. 2 |** (a) HAADF image of Au3Ag1Pd3 alloy and (b) the composition of Au, Ag, and Pd in Au3Ag1Pd3 alloy before CO2RR measured by TEM-EDS.


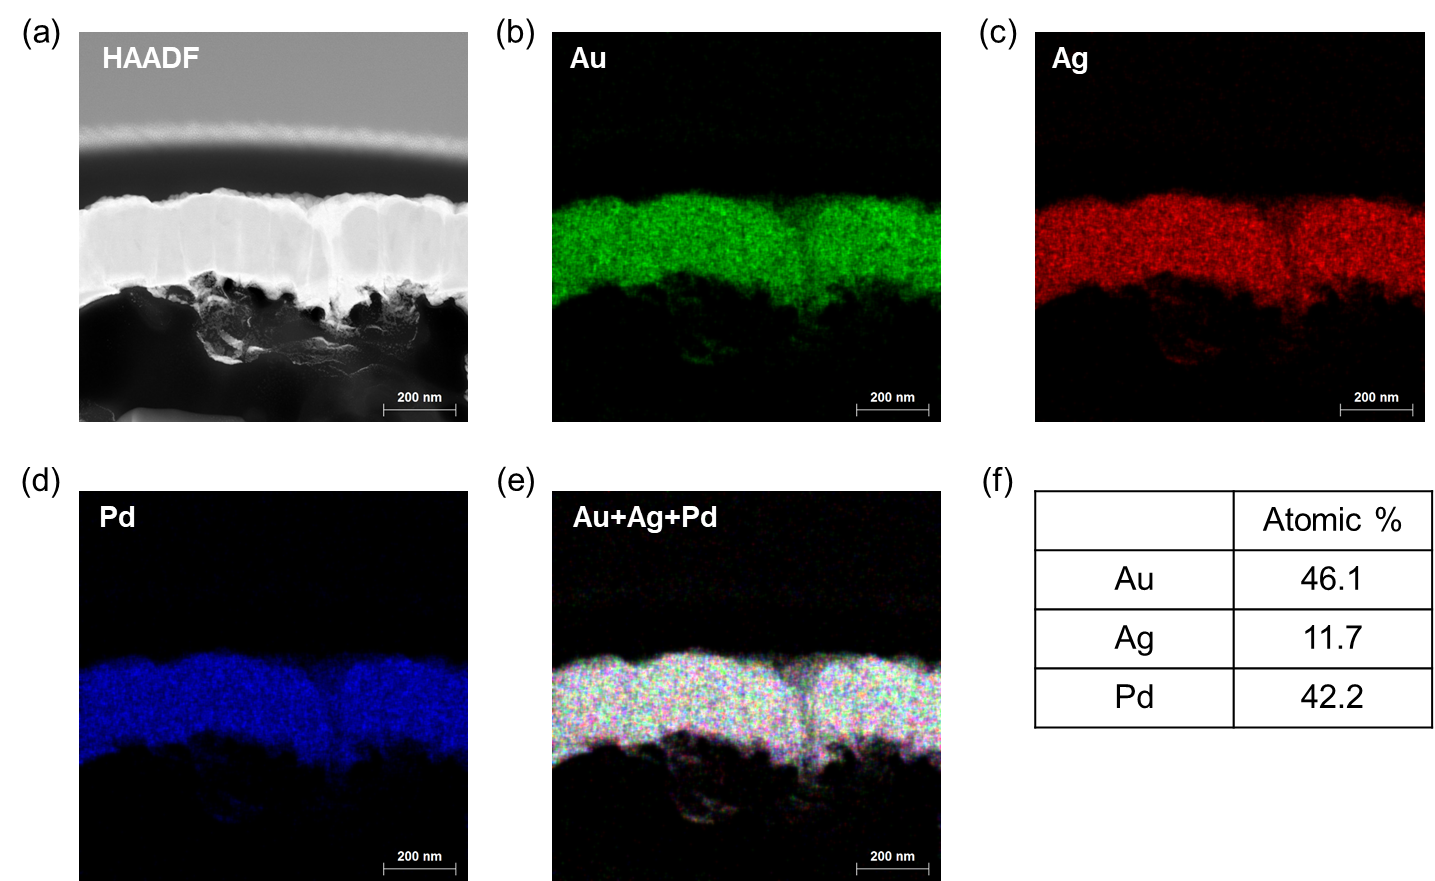


**Supplementary Fig. 3 |** (a) HAADF image and TEM-EDS images for (b) Au, (c) Ag, (d) Pd, and (e) Au, Ag and Pd after CO2RR. (d) Composition of Au, Ag, and Pd in Au3Ag1Pd3 alloy after CO2RR measured by TEM-EDS.


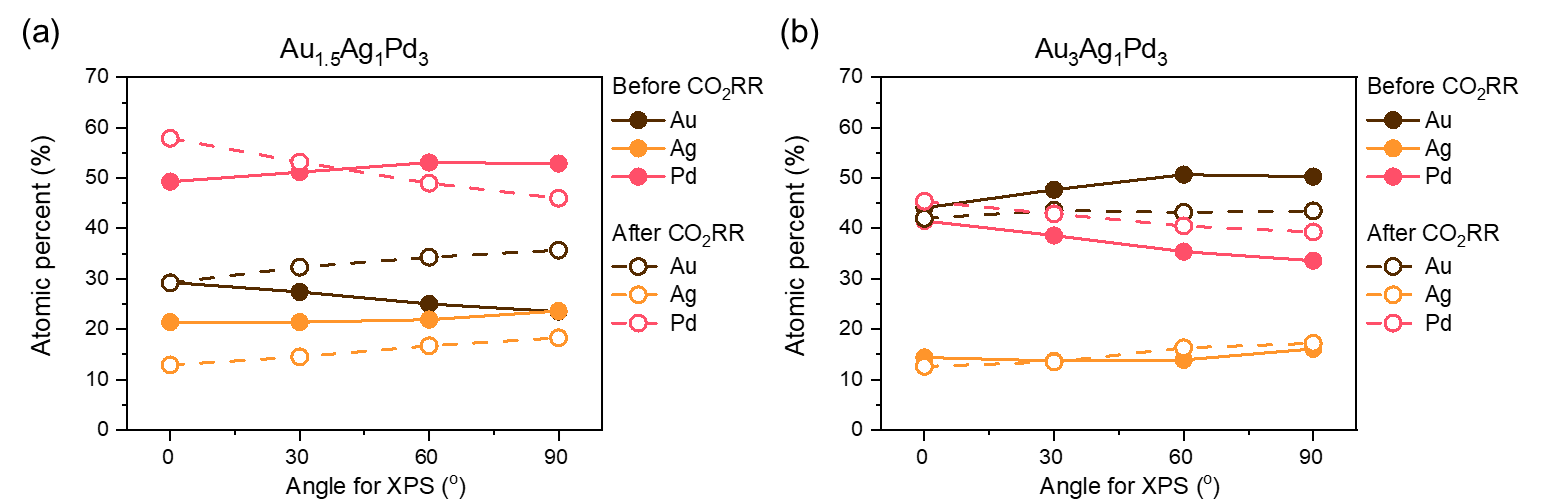


**Supplementary Fig. 4 |** ARXPS for (a) Au1.5Ag1Pd3 and (b) Au3Ag1Pd3. The solid line indicates the metal composition before CO2RR and the dotted line indicates the metal composition after CO2RR. 0º of angle for XPS represents normal take-off angle and 90º of angle for XPS represents the shallowest take-off angle.

**
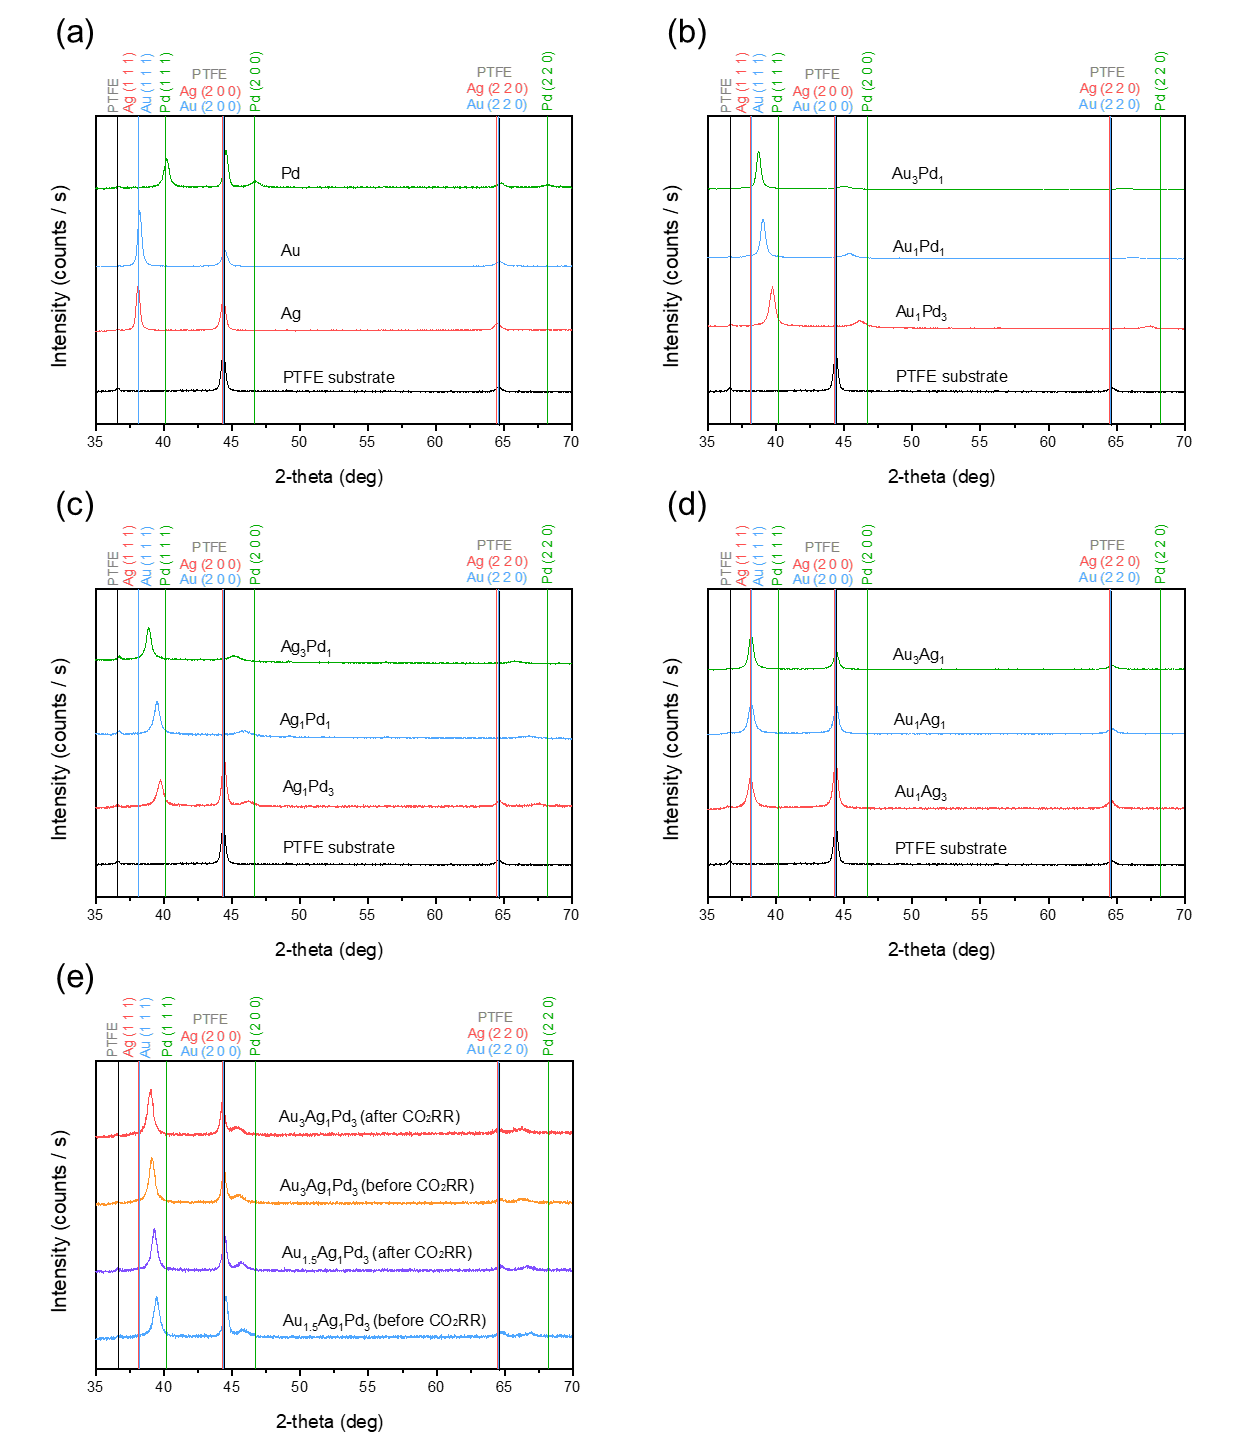
**

**Supplementary Fig. 5 |** XRD measurements for (a) pure metals (Au, Ag, and Pd) and PTFE substrate, (b) AuPd alloys, (c) AgPd alloys, (d) AuAg alloys before CO2RR, and (e) AuAgPd alloys before and after CO2RR.


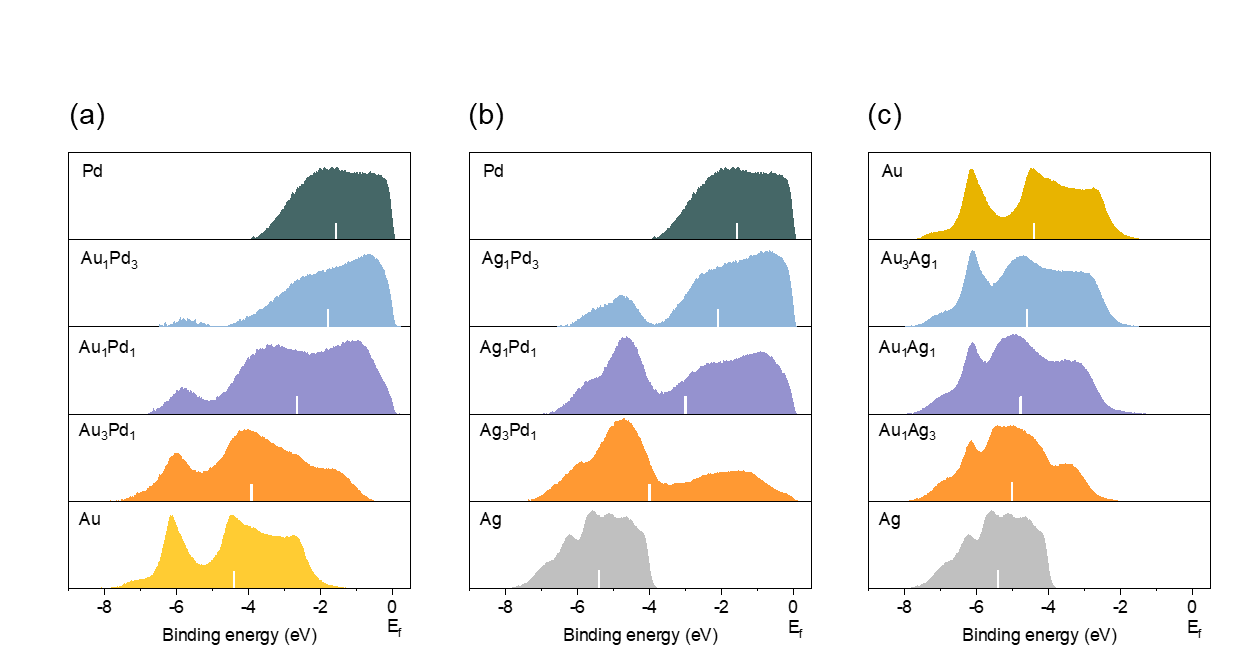


**Supplementary Fig. 6 |** d-band and d-band center of (a) Au, Pd, and AuPd alloys, (b) Ag, Pd, and AgPd alloys, (c) Au, Ag, and AuAg alloys measured by UPS before CO2RR.

**
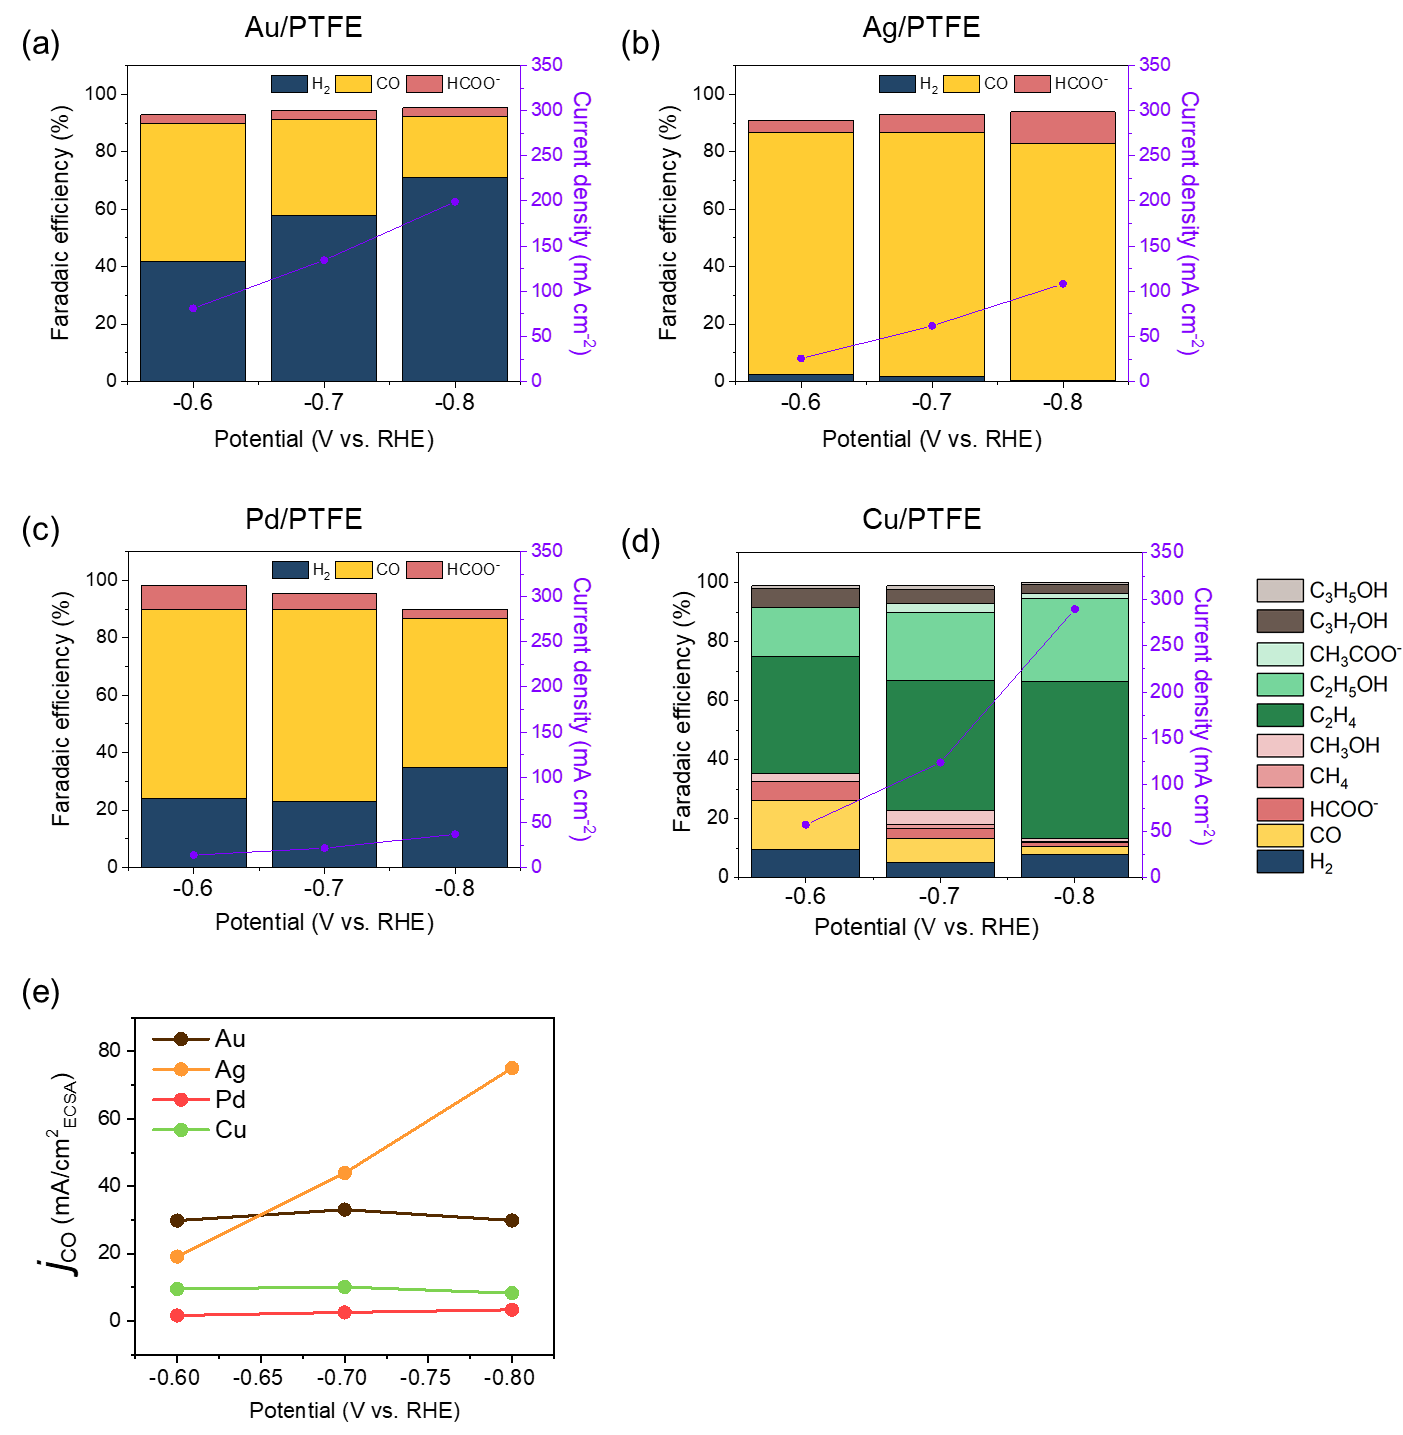
**

**Supplementary Fig. 7 |** CO2RR properties (Faradaic efficiency and total current density) of (a) Au/PTFE, (b) Ag/PTFE, (c) Pd/PTFE, and (d) Cu/PTFE measured at three different potential. (e) Compare the *j*CO,ECSA of Au, Ag, Pd, and Cu as a function of potential (V vs. RHE). Note that Au exhibits the largest *j*CO,ECSA at−0.60 VRHE and Ag exhibits the largest *j*CO,ECSA at both−0.60 VRHE and −0.70 VRHE.


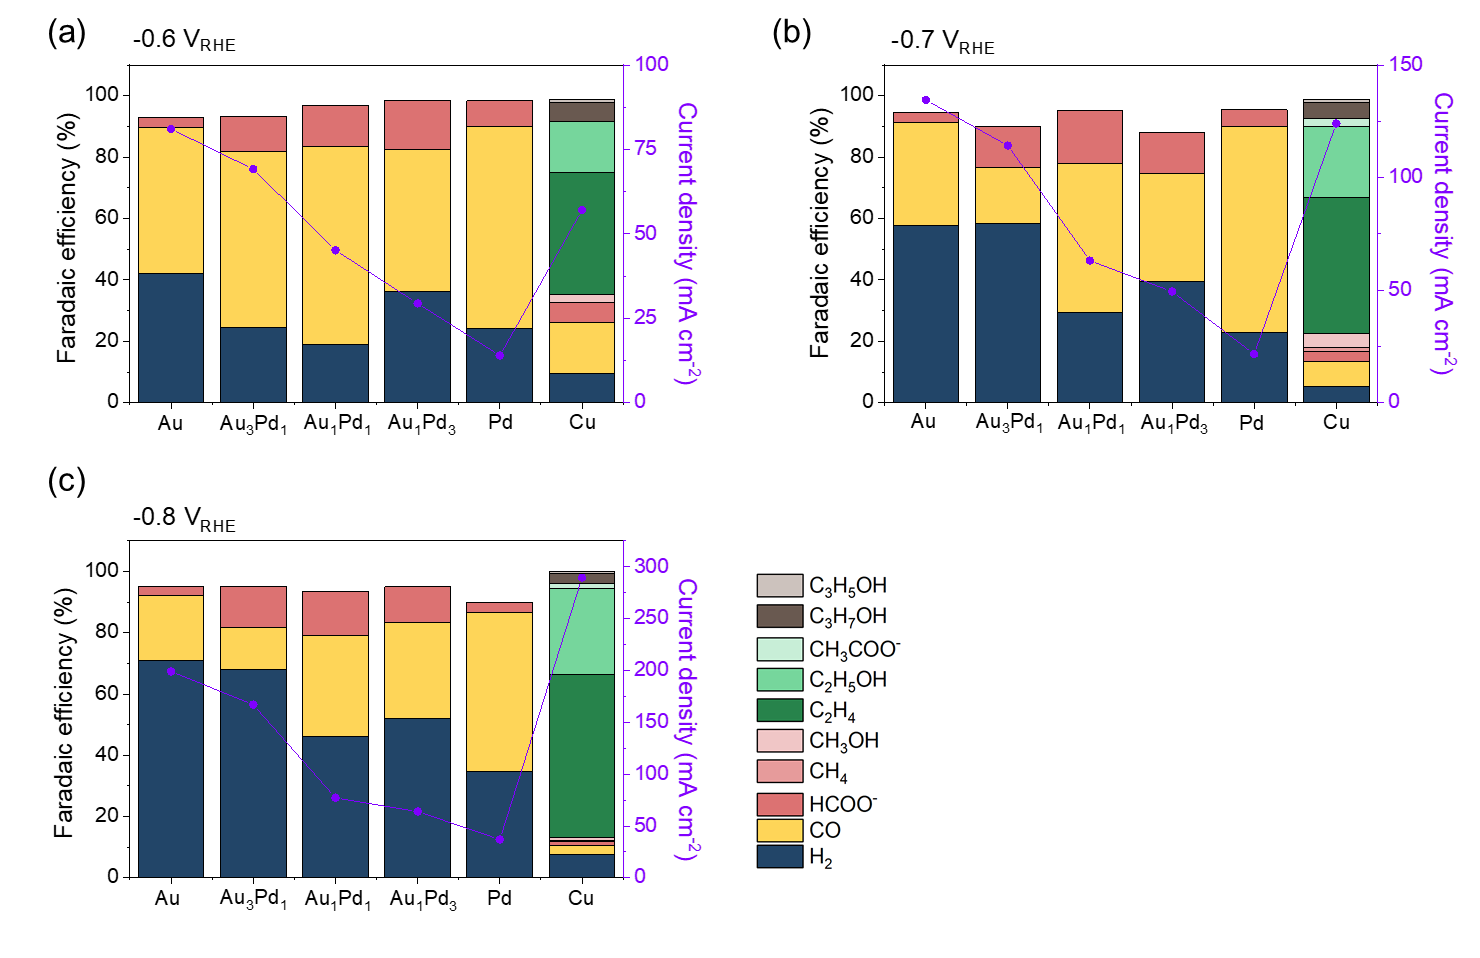


**Supplementary Fig. 8 |** CO2RR properties (Faradaic efficiency and total current density) of AuPd alloys at (a) −0.6 VRHE, (b) −0.7 VRHE, and (c) −0.8 VRHE. Note that the total current density decreases with an increase in the Pd composition.

**
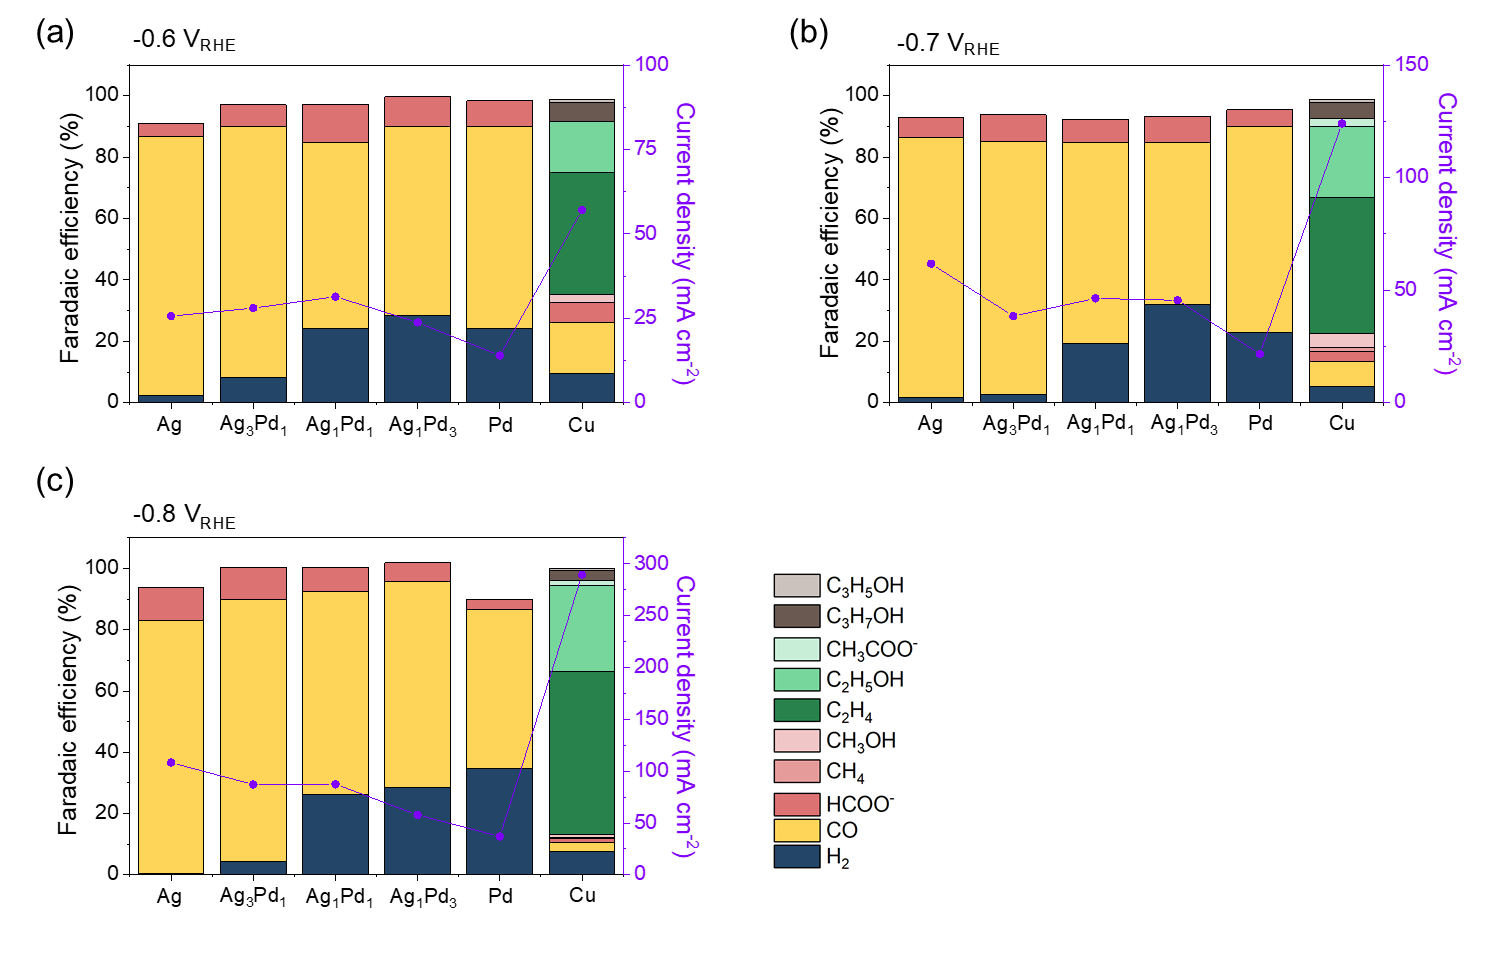
**

**Supplementary Fig. 9 |** CO2RR properties (Faradaic efficiency and total current density) of AgPd alloys at (a) −0.6 VRHE, (b) −0.7 VRHE, and (c) −0.8 VRHE. Note that the total current density decreases with an increase in the Pd composition.


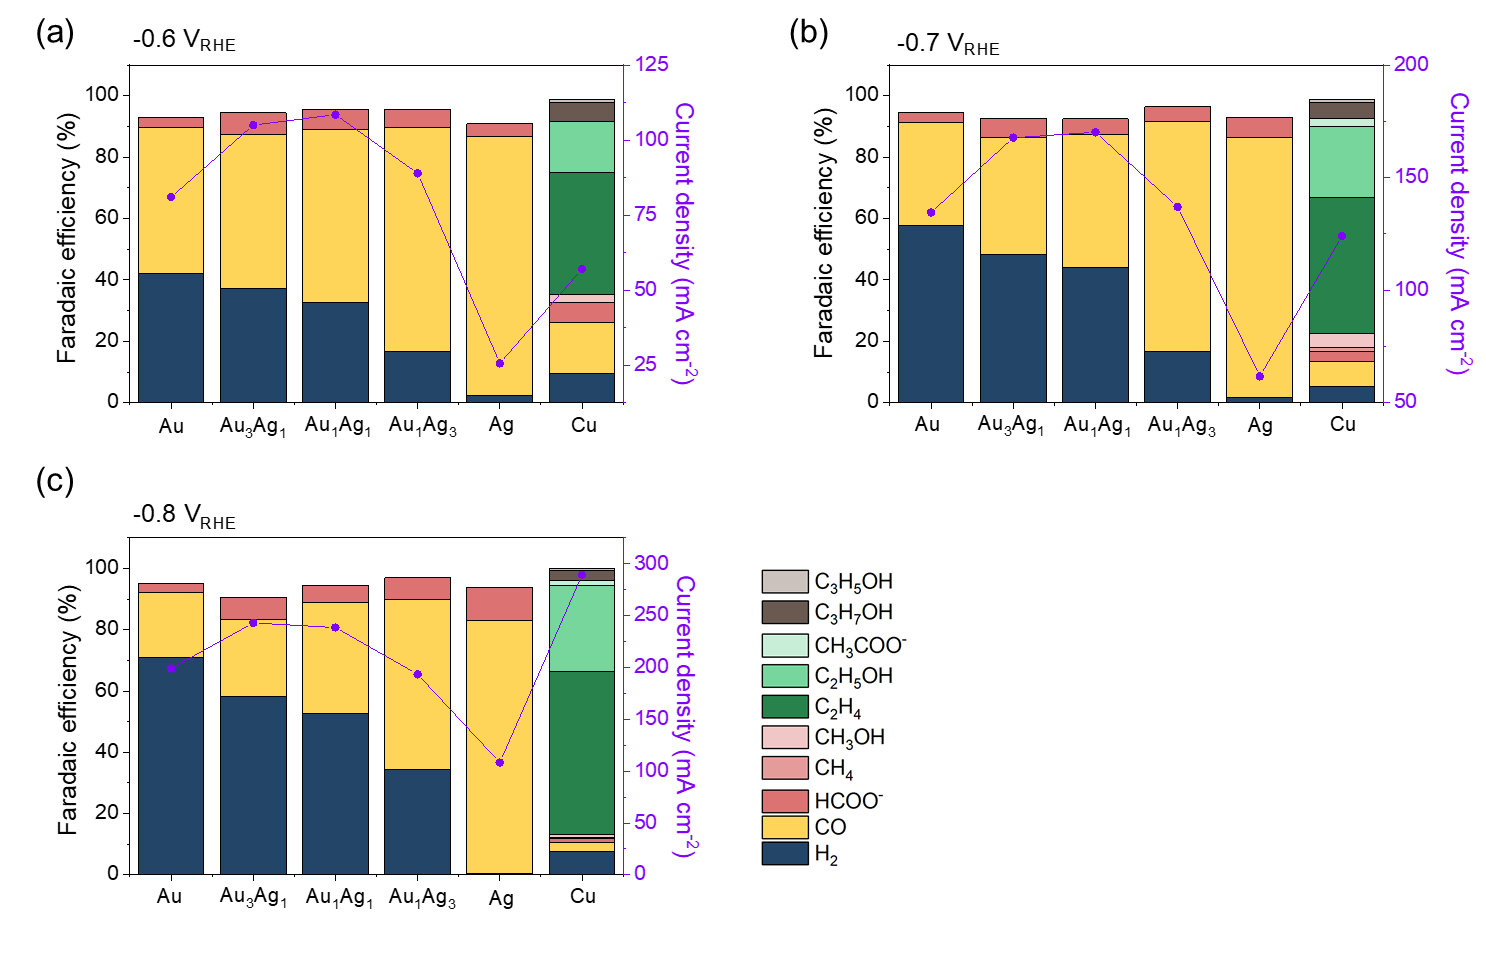


**Supplementary Fig. 10 |** CO2RR properties (Faradaic efficiency and total current density) of AuAg alloys at (a) −0.6 VRHE, (b) −0.7 VRHE, and (c) −0.8 VRHE. Note that Au1Ag1 exhibits the largest total current density at both −0.6 VRHE and −0.7 VRHE, while Au3Ag1 exhibits the largest total current density at −0.8 VRHE.

**
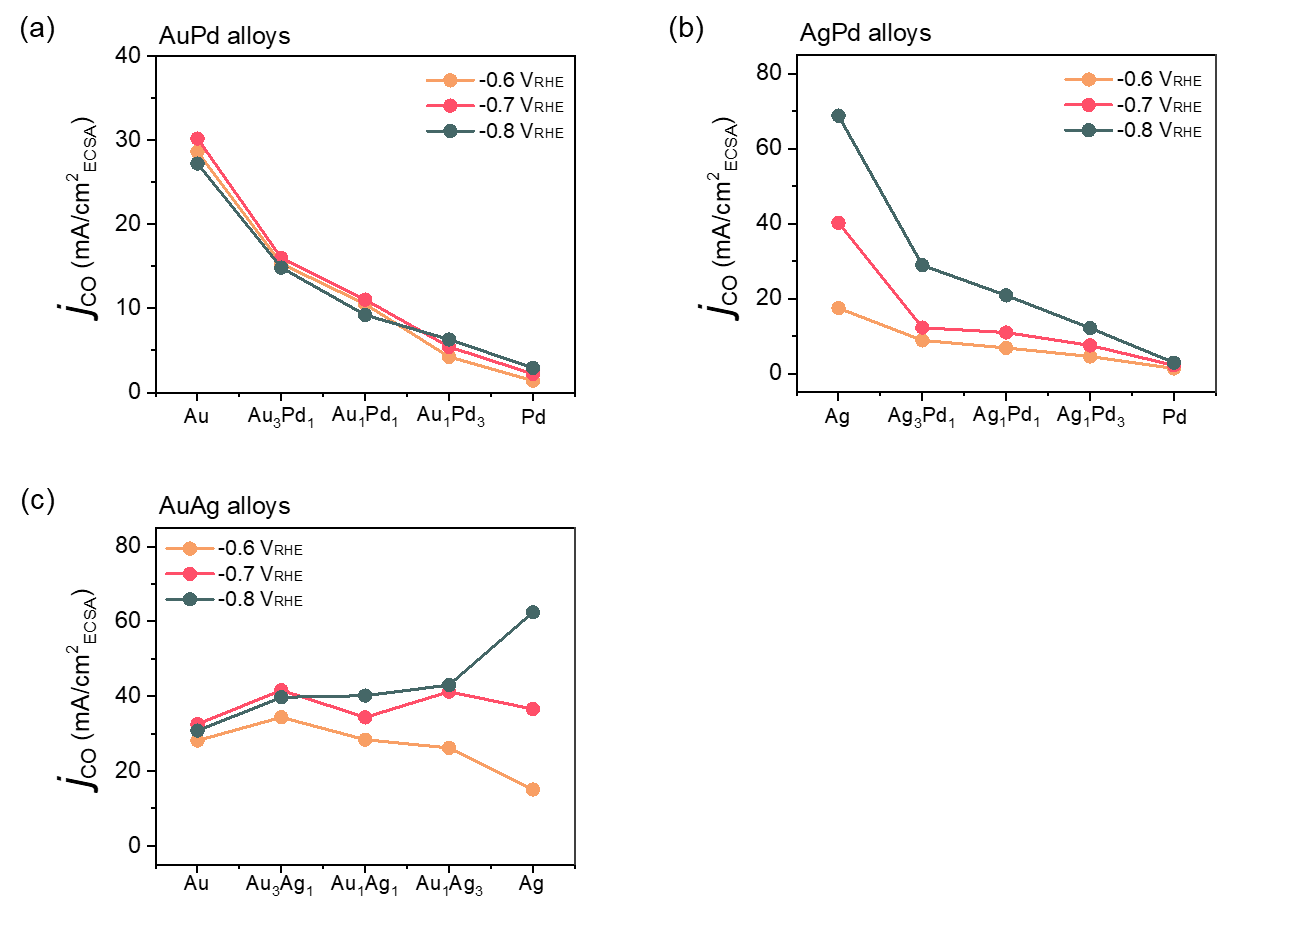
**

**Supplementary Fig. 11 |** The*j*CO,ECSA of (a) AuPd alloys, (b) AgPd alloys, and (c) AuAg alloys as a function of the composition of alloys at −0.6 VRHE, −0.7 VRHE, and −0.8 VRHE. For AuPd alloys and AgPd alloys, the *j*CO,ECSA decreases more rapidly than the increase in Pd composition at both −0.6 VRHE, −0.7 VRHE, and −0.8 VRHE. It is difficult to discern the trend of *j*CO,ECSA for AuAg alloys as a function of composition.

**
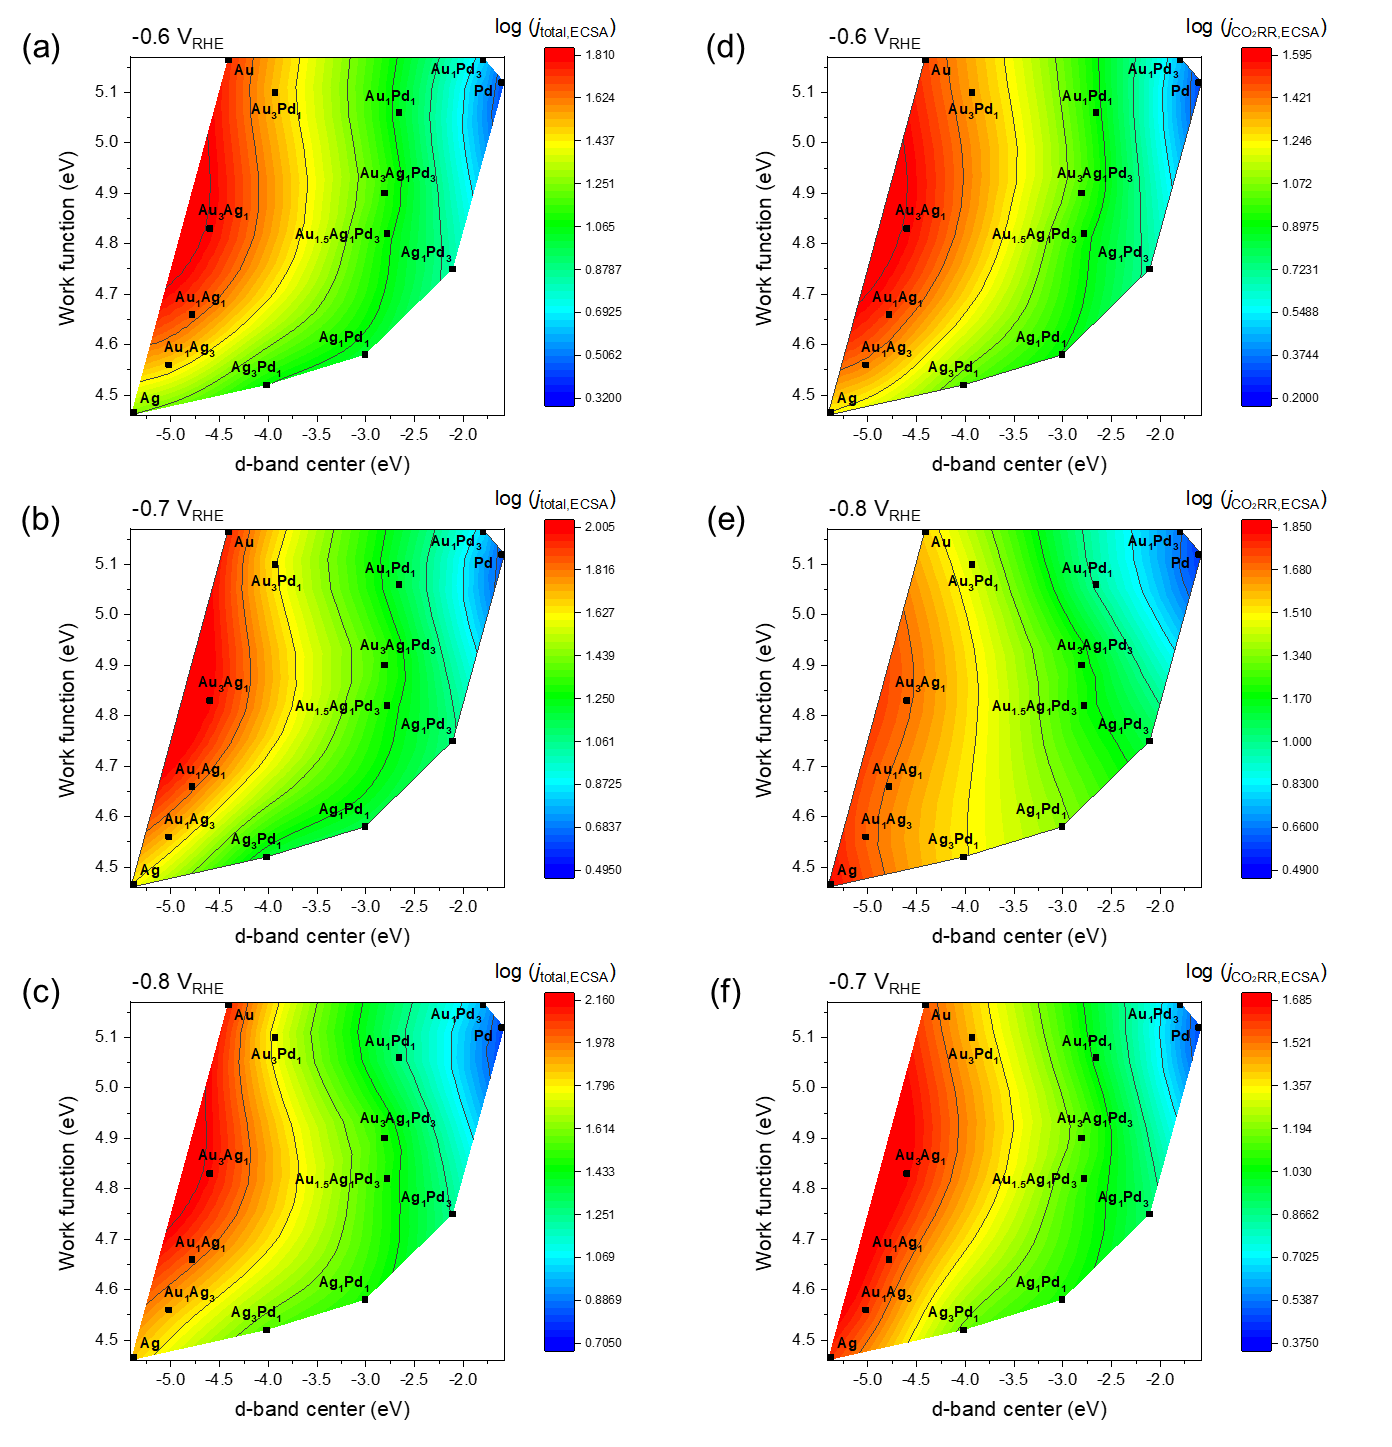
**

**Supplementary Fig. 12 |** Contour plots for the logarithm of *j*total,ECSA as a function of the d-band center and work function for every alloy at (a) −0.6 VRHE, (b) −0.7 VRHE, and (c) −0.8 VRHE. Contour plots for the logarithm of *j*CO2RR,ECSA as a function of the d-band center and work function for every alloy at (d) −0.6 VRHE, (e) −0.7 VRHE, and (f) −0.8 VRHE.

**
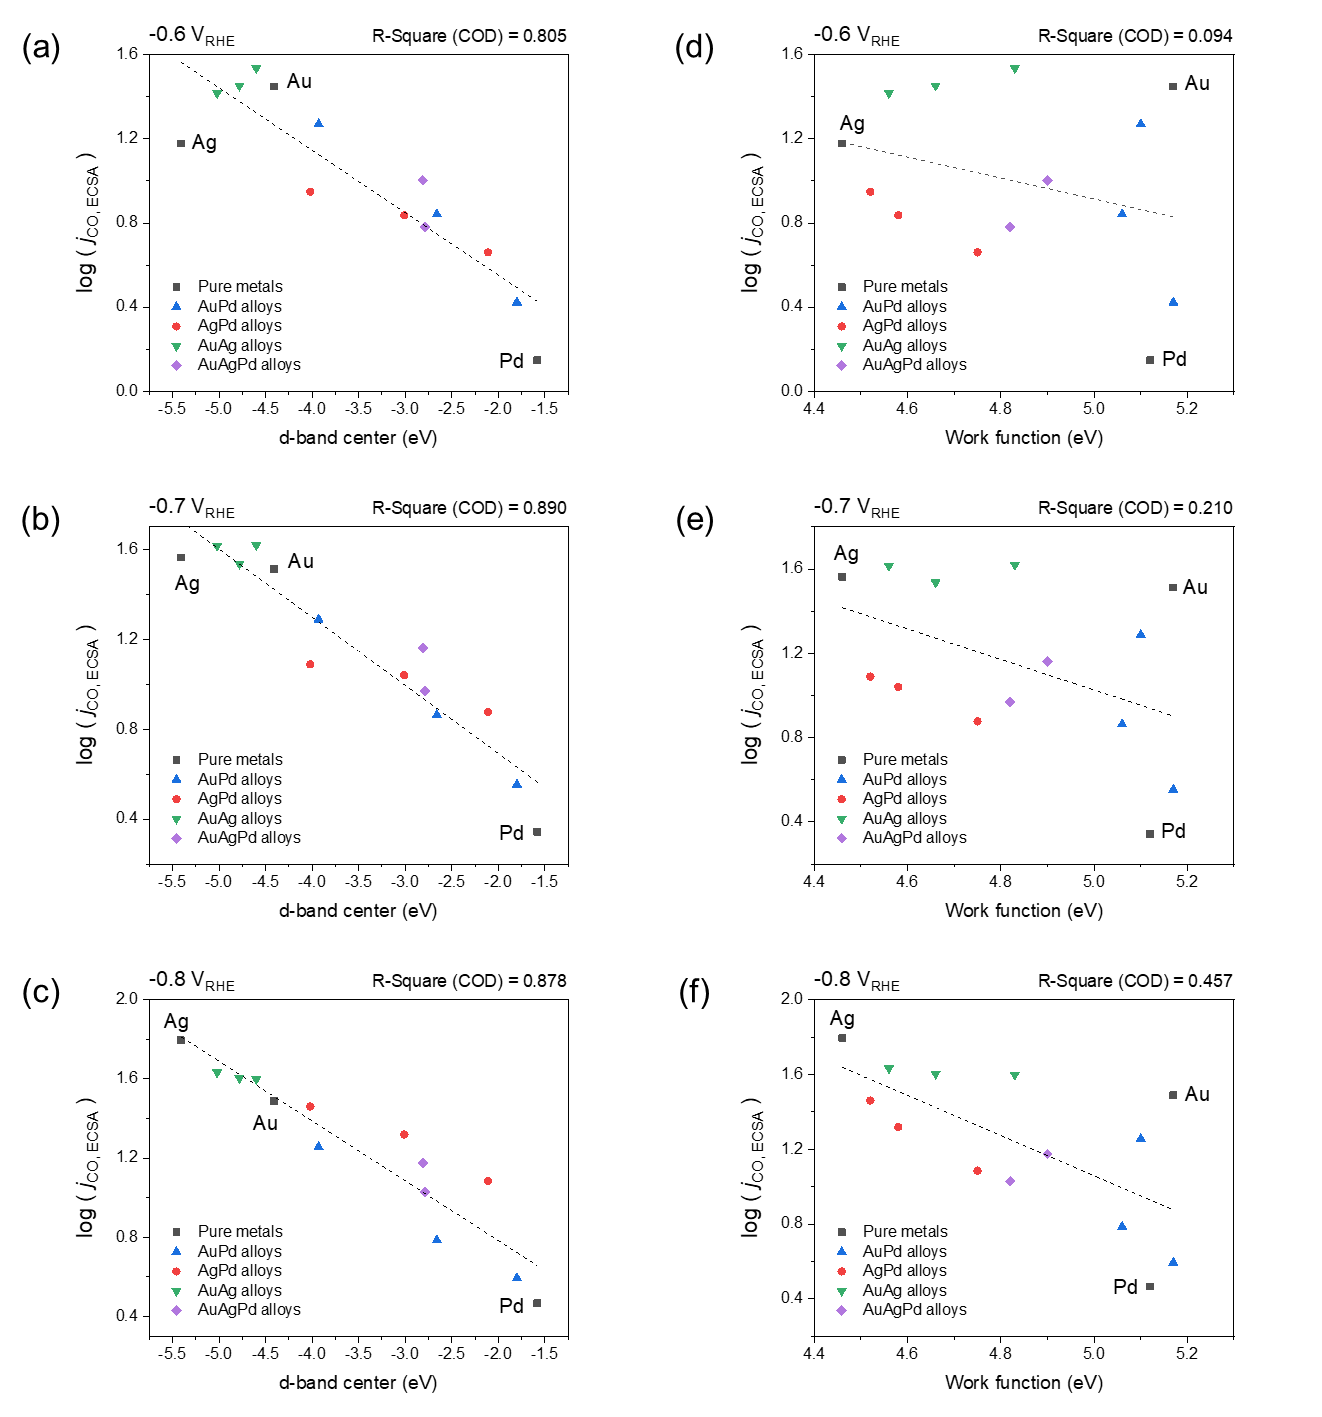
**

**Supplementary Fig. 13 |** Scatter plots for the logarithm of *j*CO,ECSA as a function of the d-band center for every alloy at (a) −0.6 VRHE, (b) −0.7 VRHE, and (c) −0.8 VRHE. Scatter plots for the logarithm of *j*CO,ECSA as a function of the work function for every alloy at (a) -0.6 VRHE, (b) -0.7 VRHE, and (c) -0.8 VRHE.


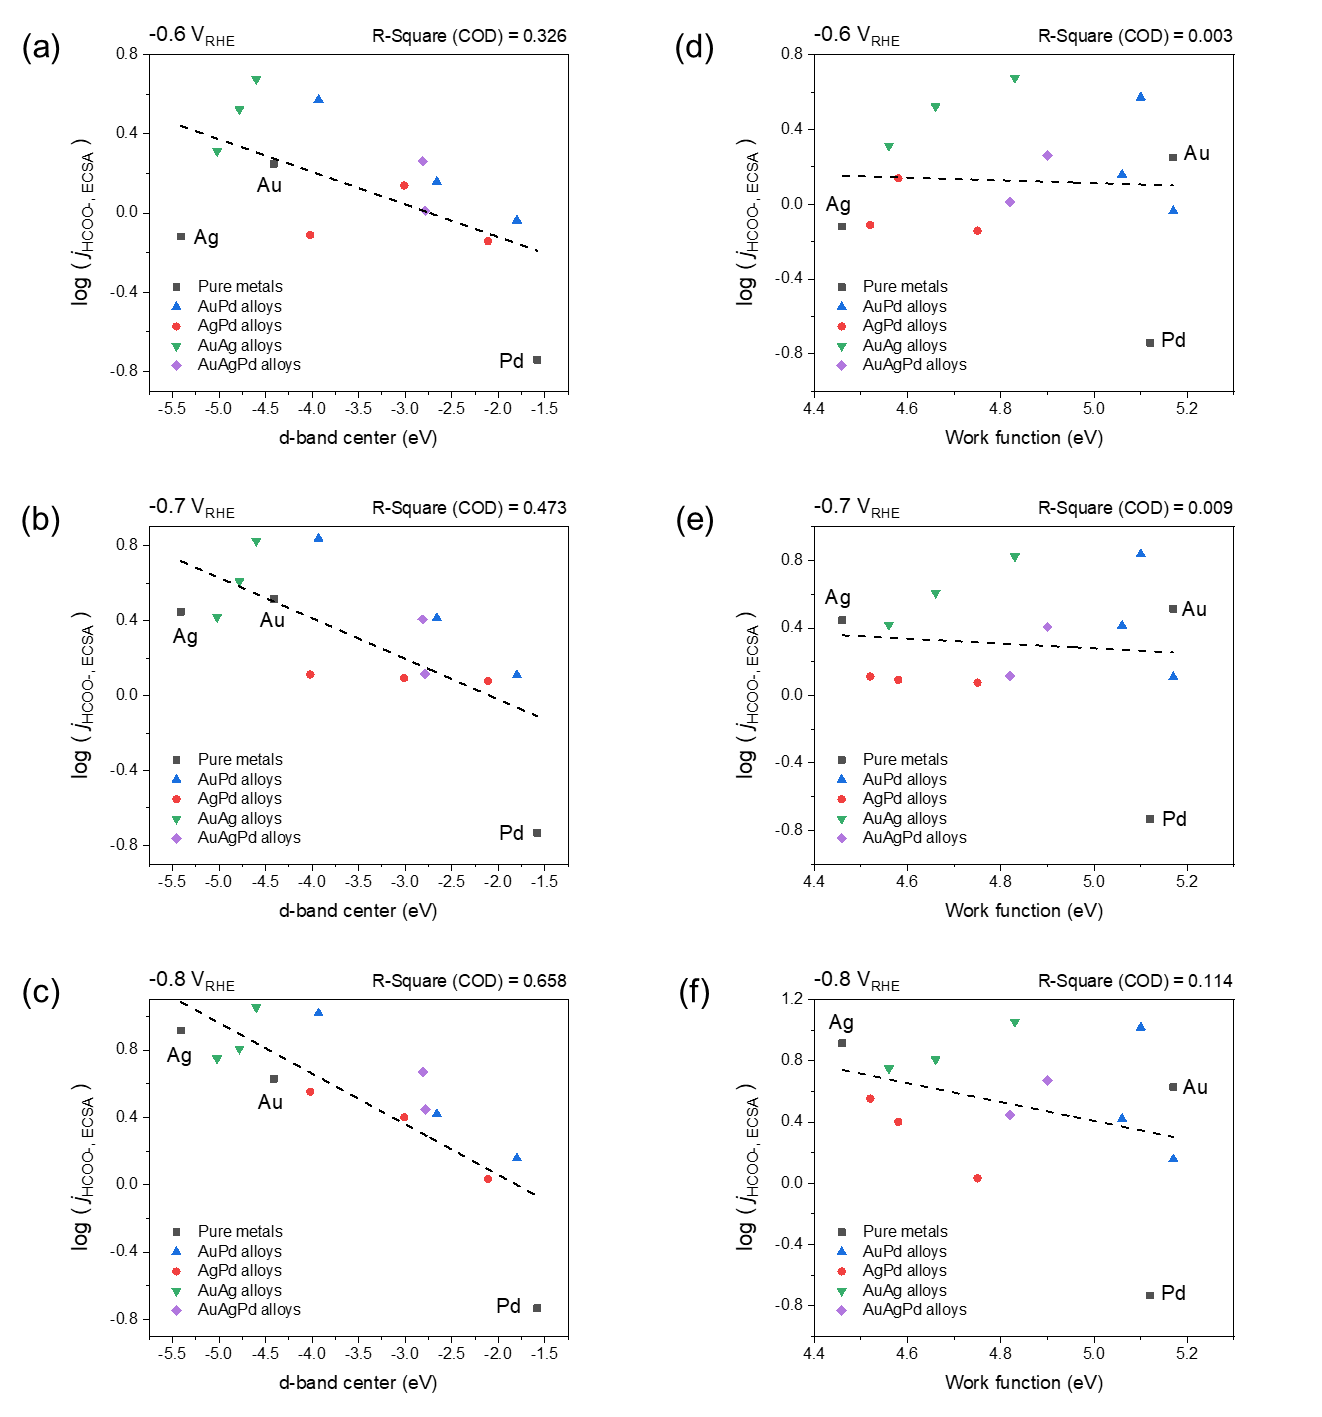


**Supplementary Fig. 14 |** Scatter plots for the logarithm of *j*HCOO-,ECSA as a function of the d-band center for every alloy at (a) −0.6 VRHE, (b) −0.7 VRHE, and (c) −0.8 VRHE. Scatter plots for the logarithm of *j*HCOO-,ECSA as a function of the work function for every alloy at (d) −0.6 VRHE, (e) −0.7 VRHE, and (f) −0.8 VRHE.


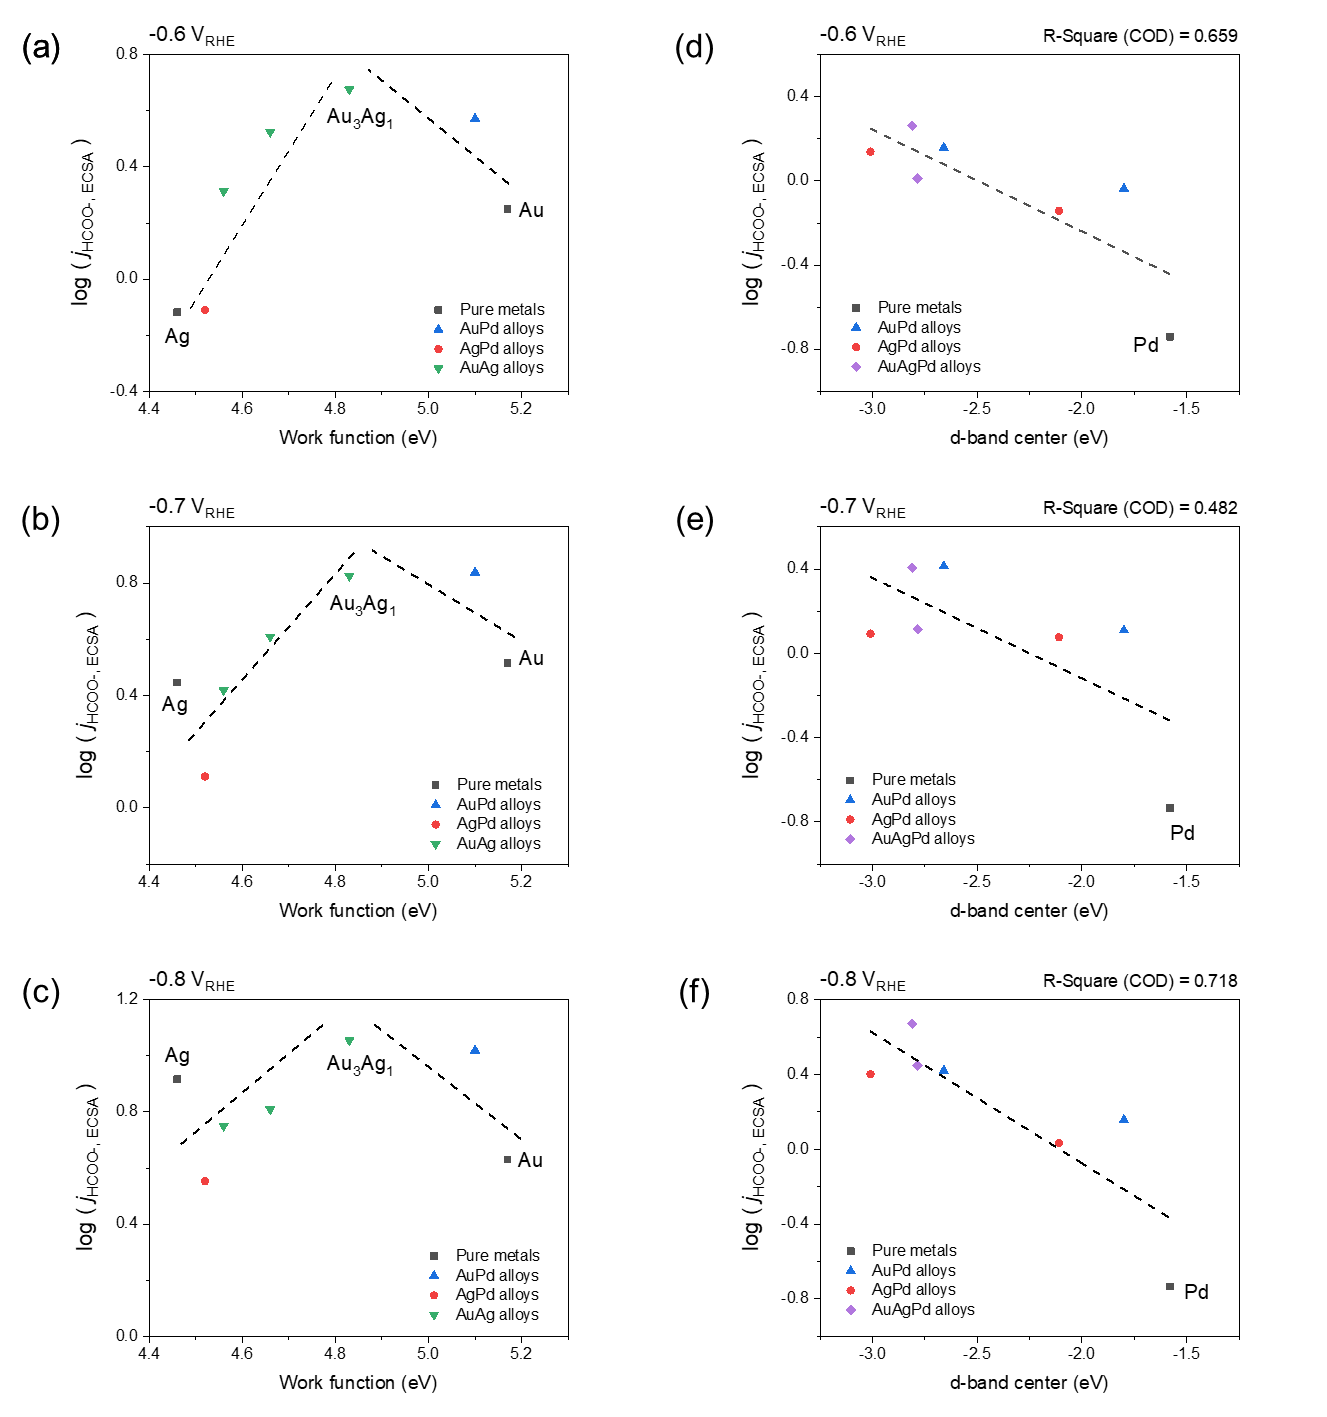


**Supplementary Fig. 15 |** Scatter plots for the logarithm of *j*HCOO-,ECSA as a function of the work function for particular alloys with d-band center lower than −3.5 eV at (a) −0.6 VRHE, (b) −0.7 VRHE, and (c) −0.8 VRHE. Scatter plots for the logarithm of *j*HCOO-,ECSA as a function of the d-band center for particular alloys with d-band center values higher than −3.0 eV at (d) −0.6 VRHE, (e) −0.7 VRHE, and (f) −0.8 VRHE.


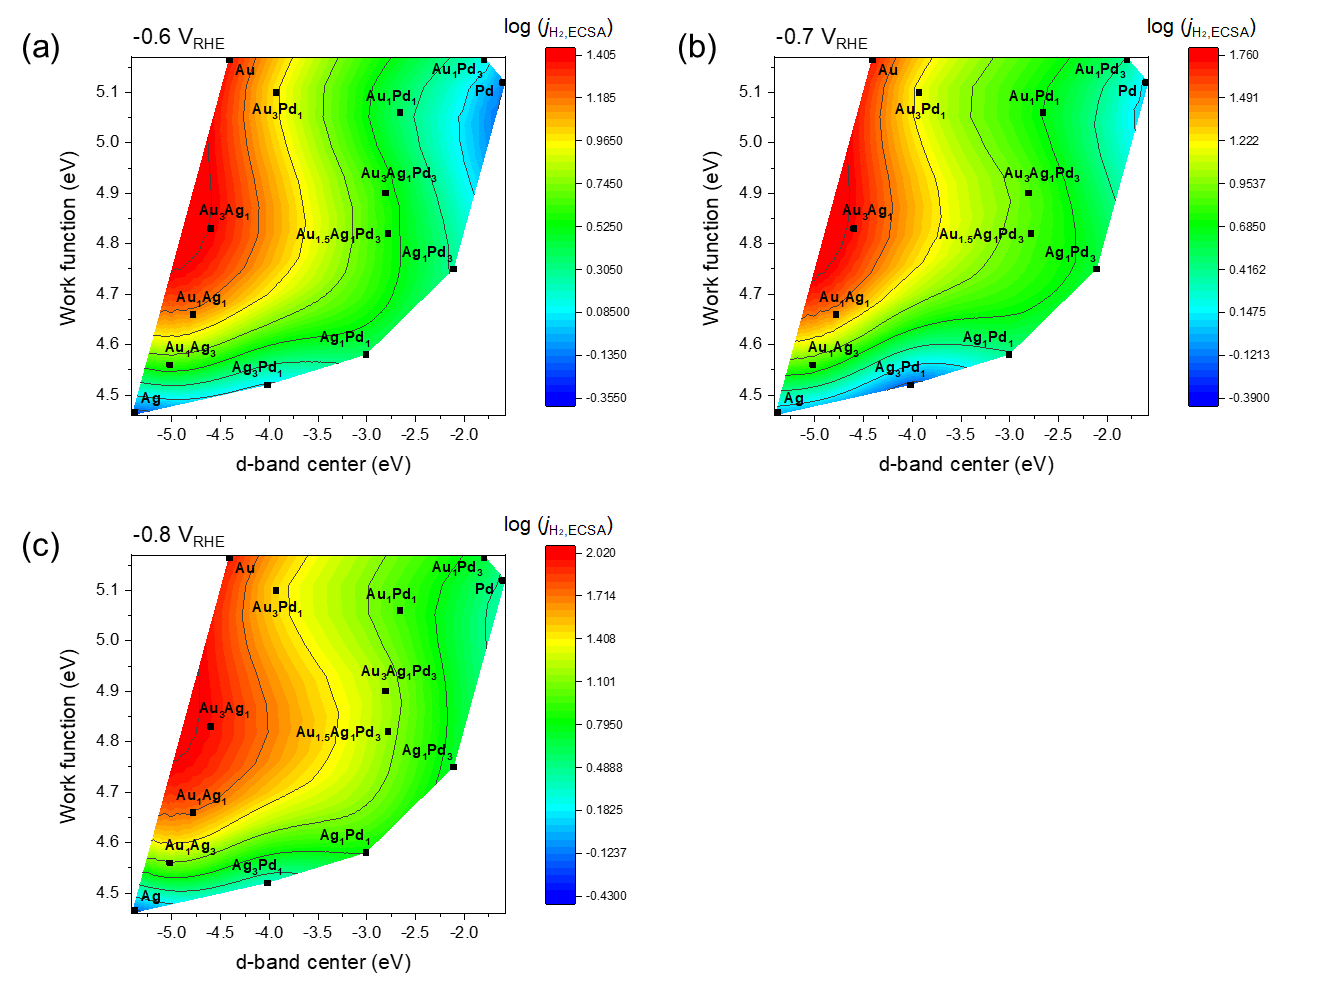
**Supplementary Fig. 16 |** Contour plots for the logarithm of *j*H2,ECSA as a function of the d-band center and work function for every alloy at (d) −0.6 VRHE, (e) −0.7 VRHE, and (f) −0.8 VRHE.

**
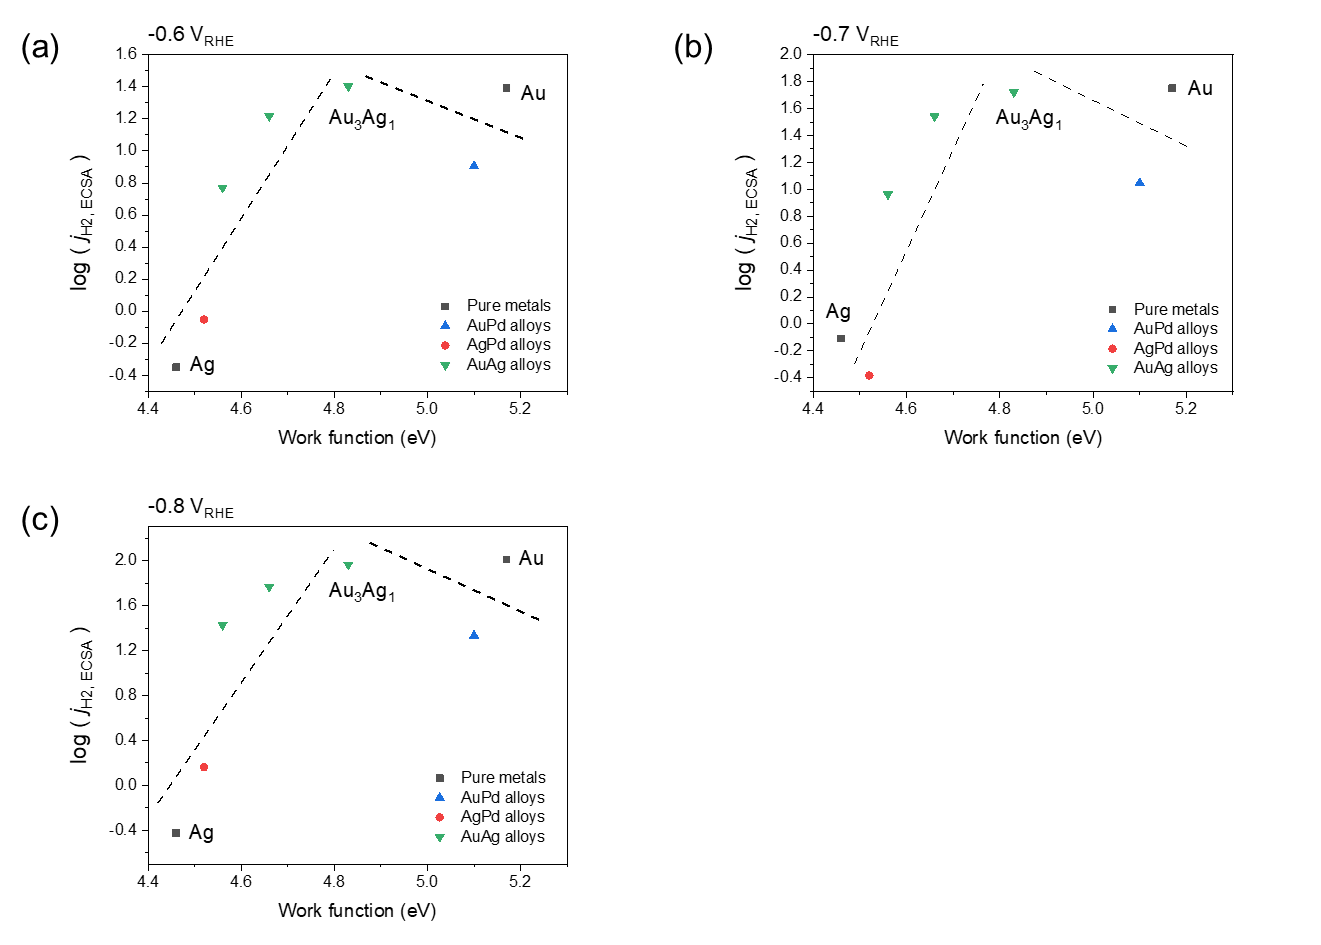
**

**Supplementary Fig. 17 |** Scatter plots for the logarithm of *j*H2,ECSA as a function of the work function for particular alloys with d-band center lower than −3.5 eV at (a) −0.6 VRHE, (b) −0.7 VRHE, and (c) −0.8 VRHE.

**
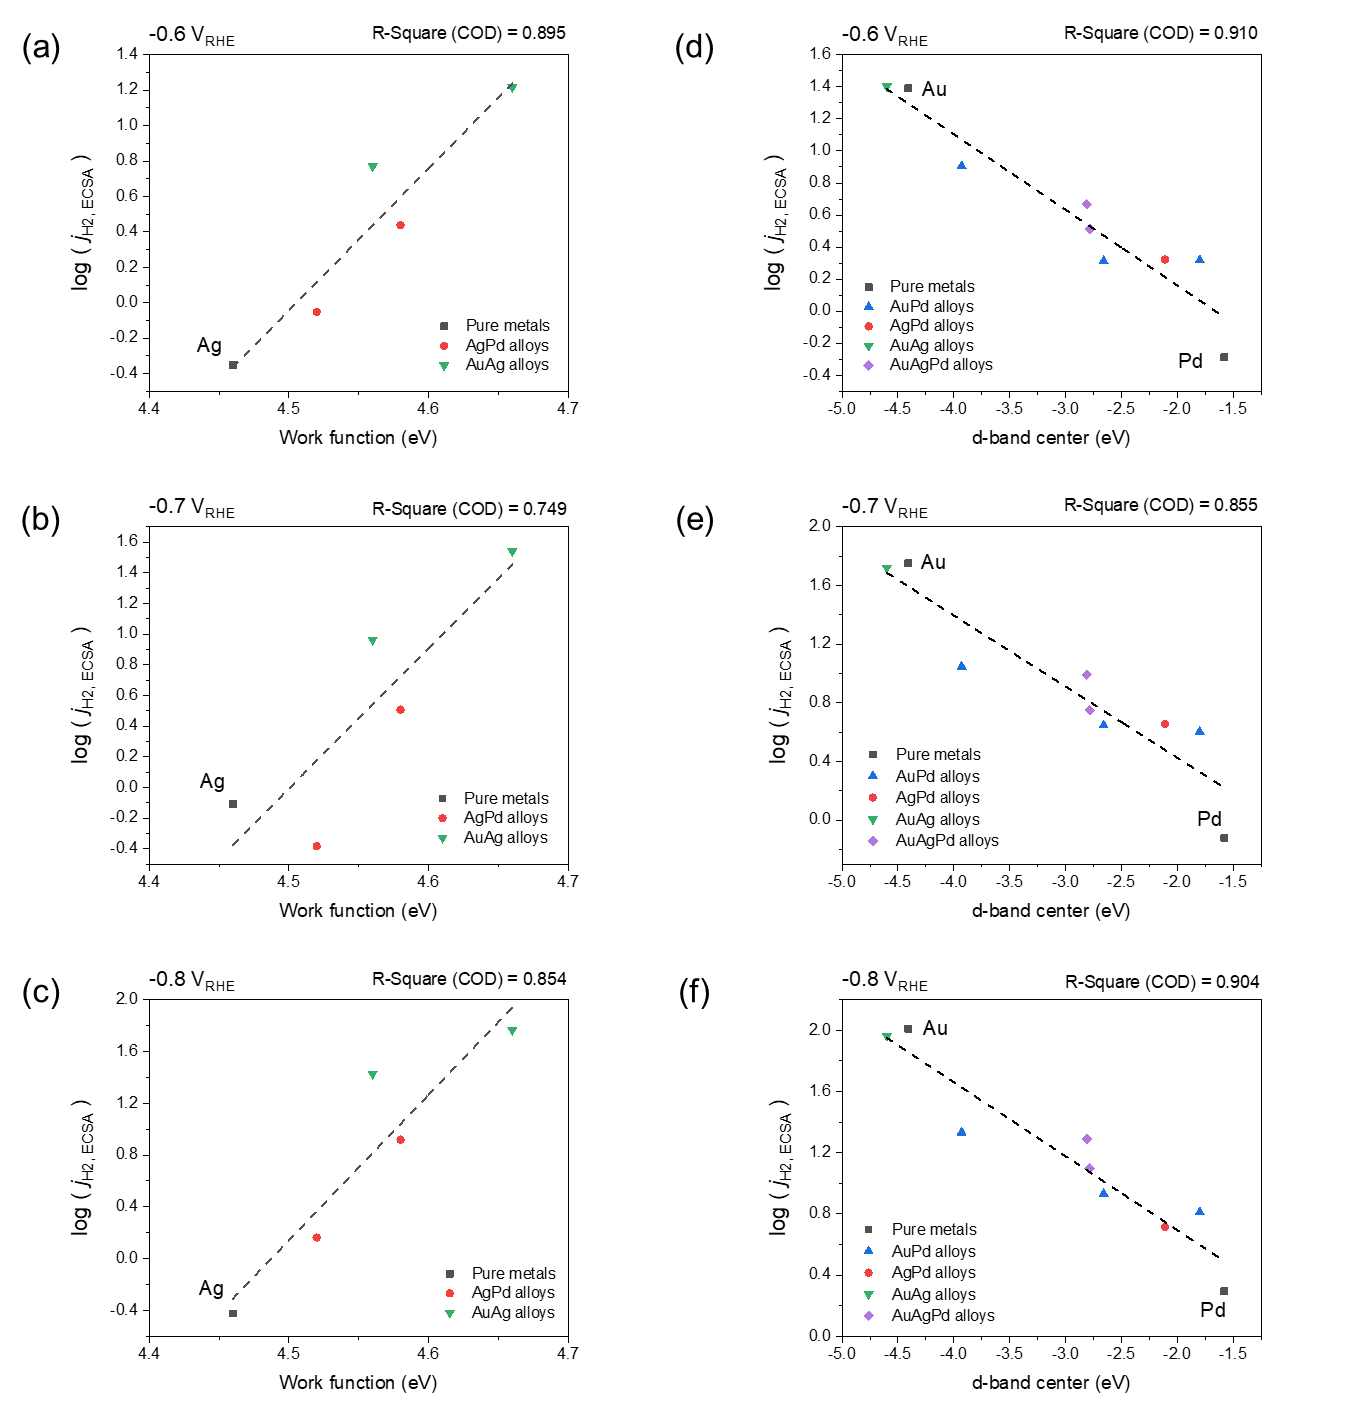
**

**Supplementary Fig. 18 |** Scatter plots for the logarithm of *j*H2,ECSA as a function of the work function for particular alloys with work function lower than 4.7 eV at (a) −0.6 VRHE, (b) −0.7 VRHE, and (c) −0.8 VRHE. Scatter plots for the logarithm of *j*H2,ECSA as a function of the d-band center for particular alloys with work function higher than 4.7 eV at (d) −0.6 VRHE, (e) −0.7 VRHE, and (f) −0.8 VRHE.


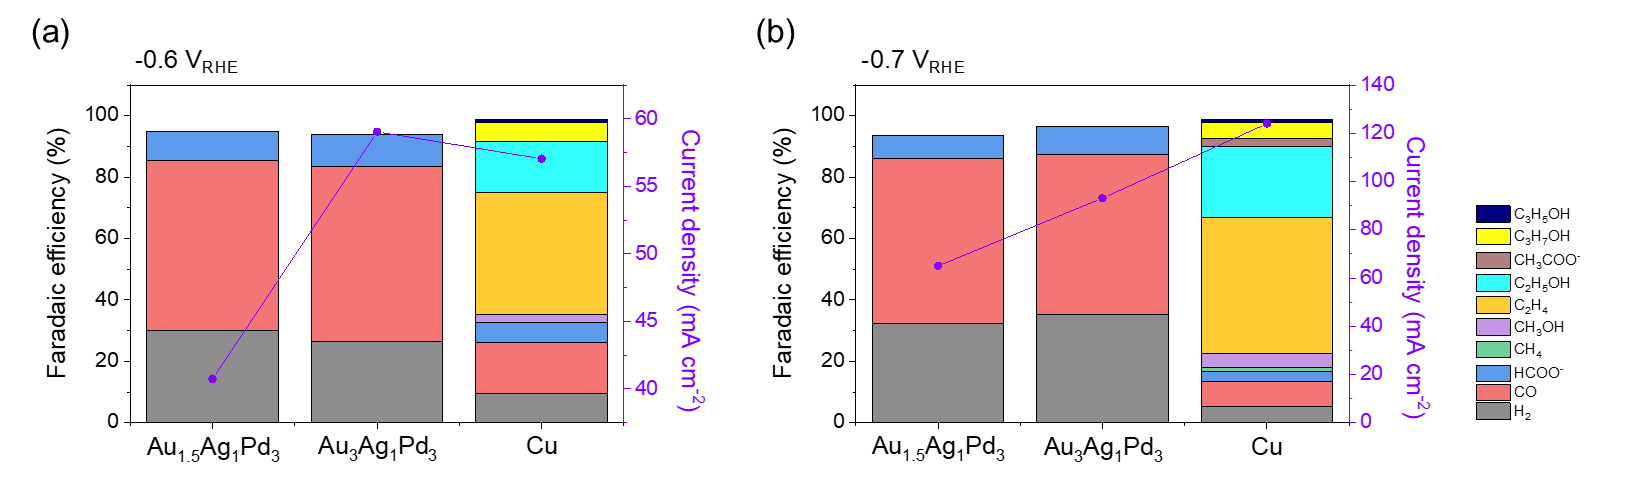


**Supplementary Fig. 19 |** CO2RR properties (Faradaic efficiency and total current density) of AuAgPd alloys and Cu at (a) −0.6 VRHE and (b) −0.7 VRHE.


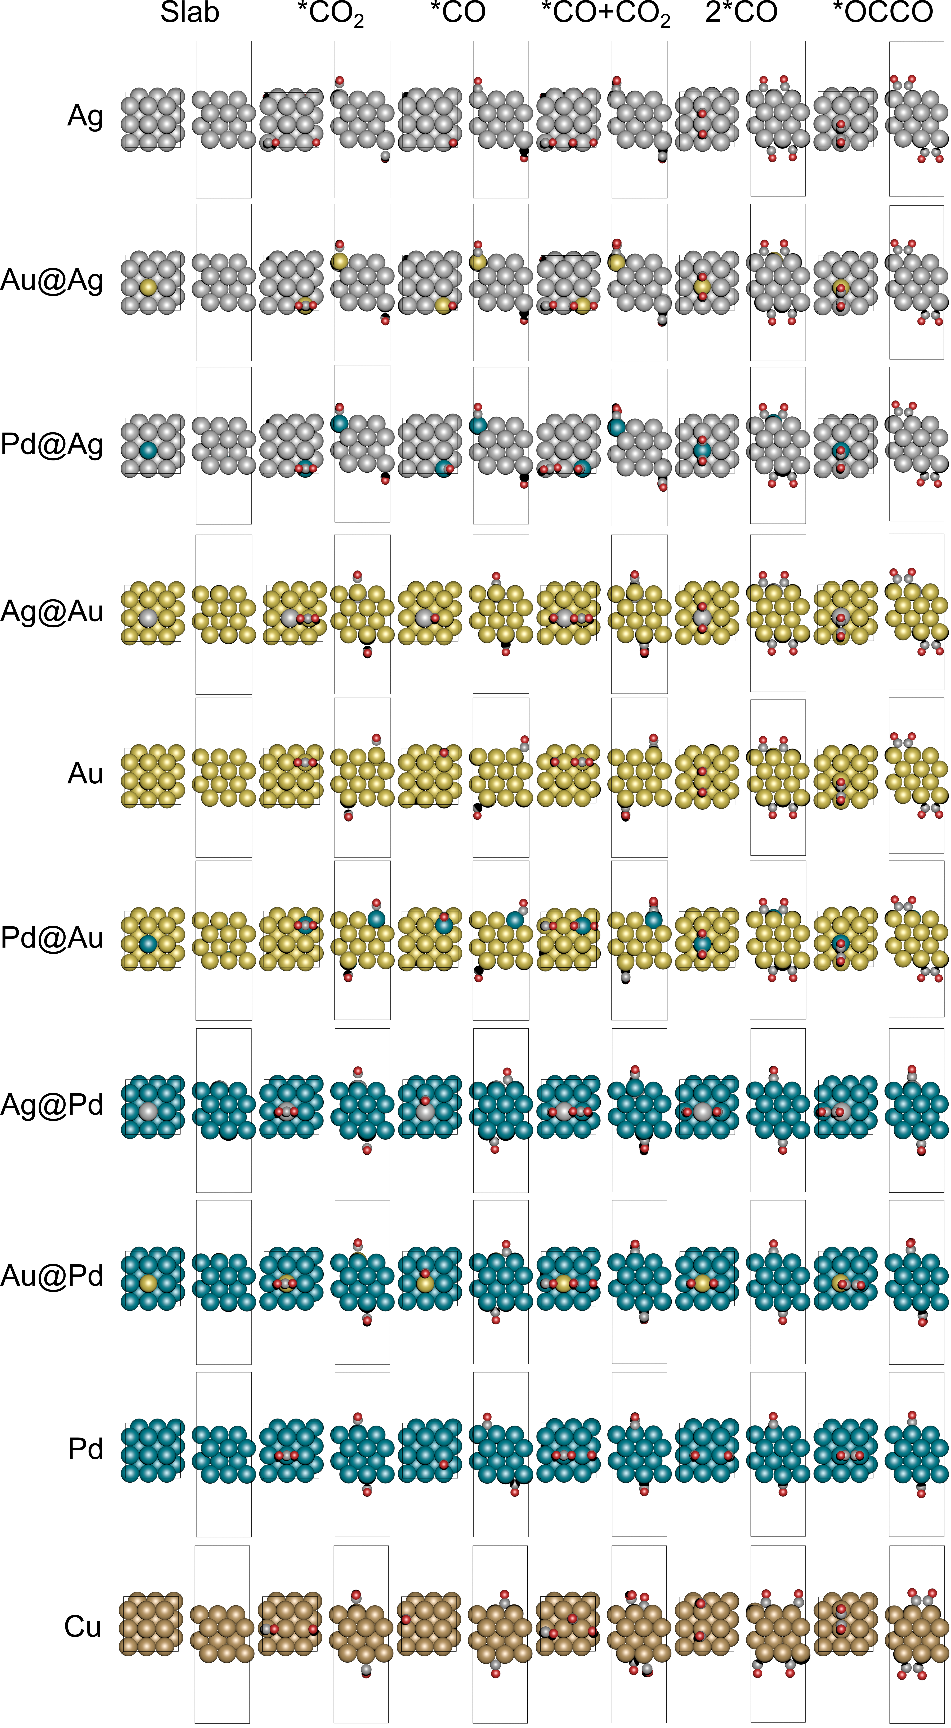


**Supplementary Fig. 20 |** Surface structures relaxed with implicit solvation. A few structures were relaxed with an additional charge to obtain realistic adsorption.


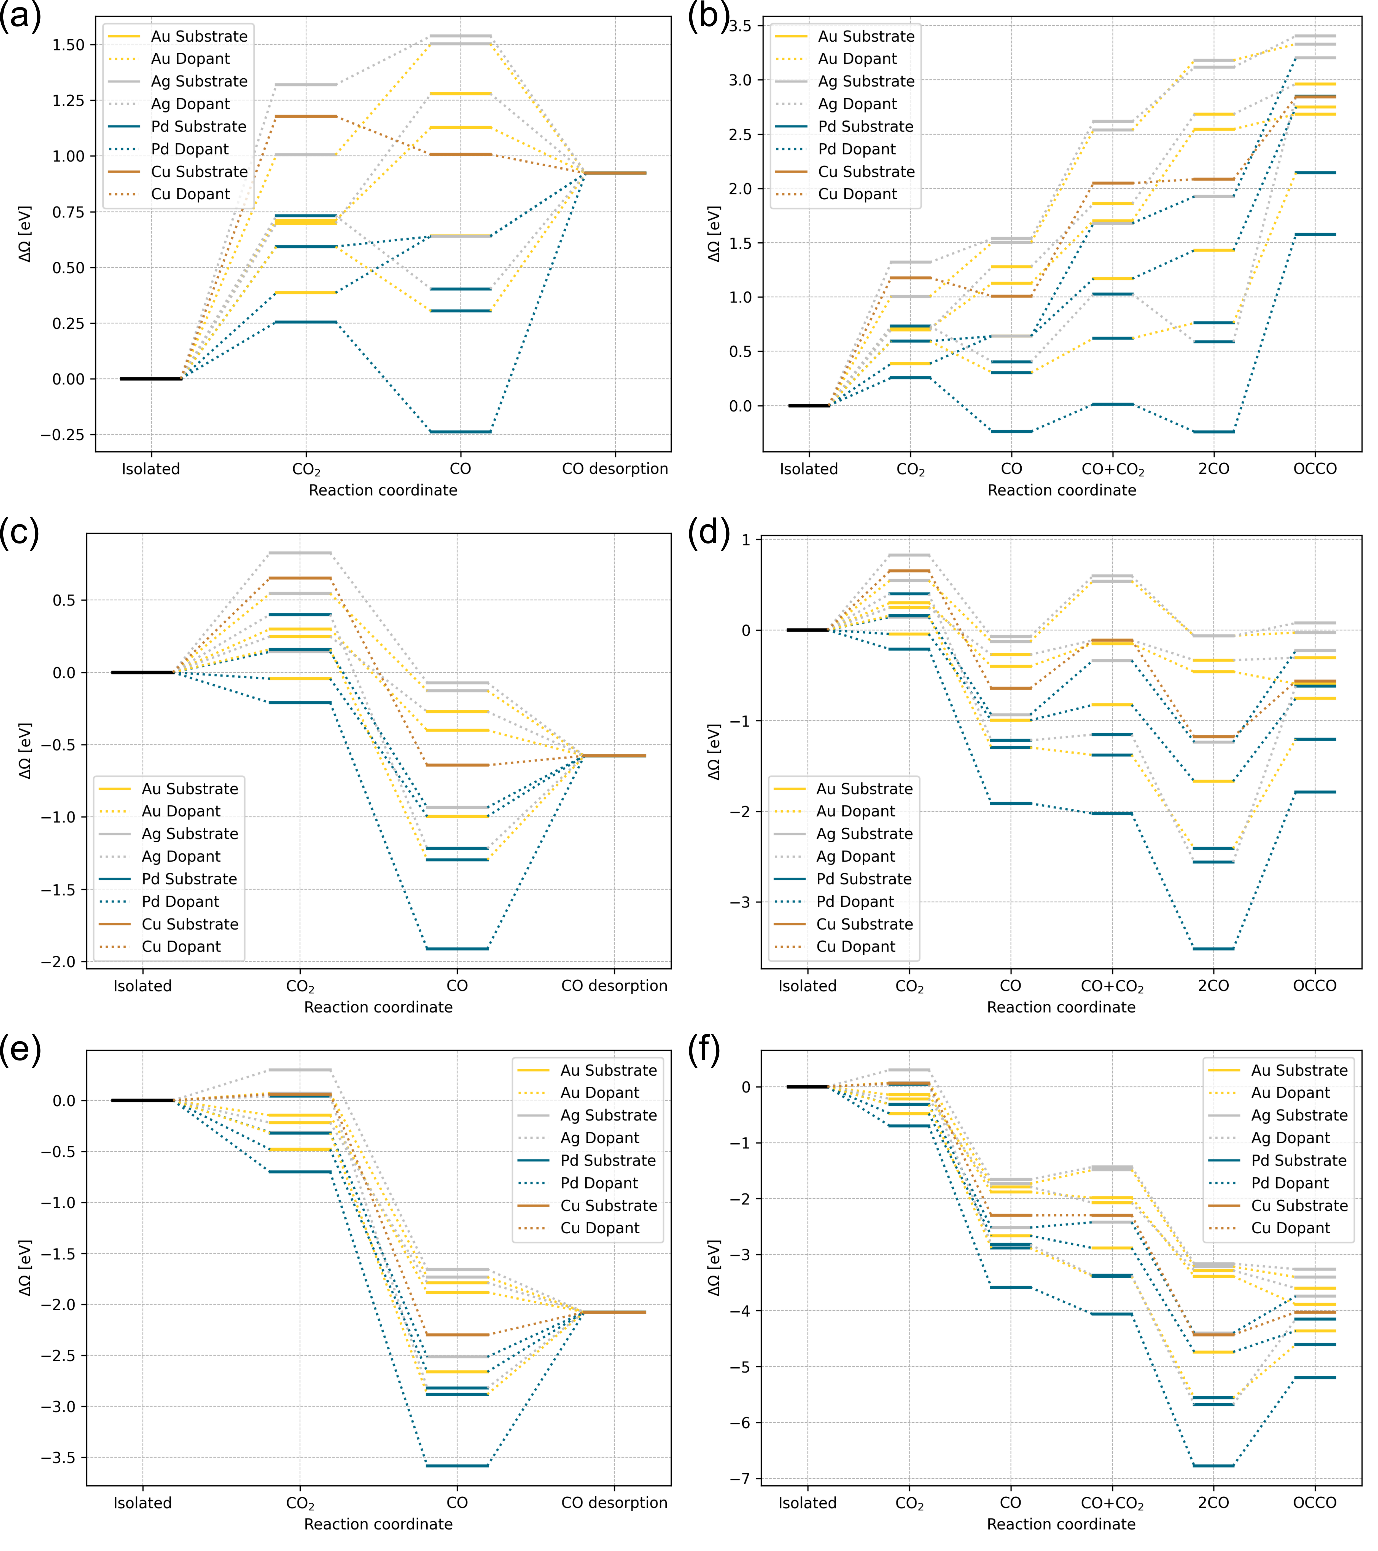


**Supplementary Fig. 21 |** DFT Calculated free energy diagram of OCCO formation for each system at (b) 0 VSHE, (d) −0.75 VSHE, and (f) −1.5 VSHE. CO desorption at (a) 0 VSHE, (c) −0.75 VSHE, and (e) −1.5 VSHE.

**Supplementary Table 1 |** The composition of every alloy measured by XPS and SEM-EDS.

| Catalysts | XPS (at.%) | | | | SEM-EDS (at.%) | | | |
| --- | --- | --- | --- | --- | --- | --- | --- | --- |
| Au3Pd1 | Au: 78.6 | | Pd: 21.4 | | Au: 80.5 | | Pd: 19.5 | |
| Au1Pd1 | Au: 54.5 | | Pd: 45.5 | | Au: 51.8 | | Pd: 48.2 | |
| Au1Pd3 | Au: 23.7 | | Pd: 76.3 | | Au: 23.6 | | Pd: 76.4 | |
| Ag3Pd1 | Ag: 77.2 | | Pd: 22.8 | | Ag: 77.7 | | Pd: 22.3 | |
| Ag1Pd1 | Ag: 52.8 | | Pd: 47.2 | | Ag: 49.2 | | Pd: 50.8 | |
| Ag1Pd3 | Ag: 25.1 | | Pd: 74.9 | | Ag: 35.8 | | Pd: 64.2 | |
| Au3Ag1 | Au: 68.8 | | Ag: 31.2 | | Au: 80.2 | | Ag: 19.8 | |
| Au1Ag1 | Au: 44.9 | | Ag: 55.1 | | Au: 60.7 | | Ag: 39.3 | |
| Au1Ag3 | Au: 22.7 | | Ag: 77.3 | | Au: 32.8 | | Ag: 67.2 | |
| Au1.5Ag1Pd3 | Au: 28.7 | Ag: 18.1 | | Pd: 53.2 | Au: 30.9 | Ag: 14.0 | | Pd: 53.1 |
| Au3Ag1Pd3 | Au: 43.4 | Ag: 14.7 | | Pd: 41.9 | Au: 43.7 | Ag: 11.6 | | Pd: 44.7 |

**Supplementary Table 2 |** Crystallite size measured by XRD measurements (Using Scherrer equation).

| **Catalysts** | **Crystallite size (nm)** |
| --- | --- |
| Au | 26.943 |
| Ag | 28.333 |
| Pd | 23.111 |
| Au3Pd1 | 25.279 |
| Au1Pd1 | 23.567 |
| Au1Pd3 | 20.256 |
| Ag3Pd1 | 23.163 |
| Ag1Pd1 | 21.015 |
| Ag1Pd3 | 20.571 |
| Au3Ag1 | 23.125 |
| Au1Ag1 | 21.852 |
| Au1Ag3 | 21.571 |
| Au1.5Ag1Pd3 | 21.493 |
| Au3Ag1Pd3 | 20.815 |

**Supplementary Table 3 |** The d-band center and work function of every alloy measured by UPS.

| **Catalysts** | **d-band center (eV)** | **Work function (eV)** |
| --- | --- | --- |
| Cu | −3.09 | 4.9 |
| Au | −4.41 | 5.17 |
| Ag | −5.41 | 4.46 |
| Pd | −1.58 | 5.12 |
| Au3Pd1 | −3.93 | 5.10 |
| Au1Pd1 | −2.66 | 5.06 |
| Au1Pd3 | −1.80 | 5.17 |
| Ag3Pd1 | −4.02 | 4.52 |
| Ag1Pd1 | −3.01 | 4.58 |
| Ag1Pd3 | −2.11 | 4.75 |
| Au3Ag1 | −4.60 | 4.83 |
| Au1Ag1 | −4.78 | 4.66 |
| Au1Ag3 | −5.02 | 4.56 |
| Au1.5Ag1Pd3 | −2.78 | 4.82 |
| Au3Ag1Pd3 | −2.81 | 4.90 |

**Supplementary Table 4 |** The double layer capacitance and roughness factor of every alloy.

| **Catalysts** | **Double Layer Capacitance**  **(μF/cm2)** | **Roughness factor** |
| --- | --- | --- |
| Cu | 415.5 | 1.00 |
| Au | 575.0 | 1.38 |
| Ag | 594.8 | 1.43 |
| Pd | 2718.1 | 6.54 |
| Au3Pd1 | 881.3 | 2.12 |
| Au1Pd1 | 1735.0 | 4.18 |
| Au1Pd3 | 2130.0 | 5.13 |
| Ag3Pd1 | 1073.3 | 2.58 |
| Ag1Pd1 | 1149.7 | 2.77 |
| Ag1Pd3 | 1328.2 | 3.20 |
| Au3Ag1 | 638.5 | 1.54 |
| Au1Ag1 | 894.0 | 2.15 |
| Au1Ag3 | 1035.7 | 2.49 |
| Au1.5Ag1Pd3 | 1552.1 | 3.74 |
| Au3Ag1Pd3 | 1393.3 | 3.35 |

**Supplementary Table 5 |** Calculated DFT energy at the zero charge, charge-dependent coefficients, predicted potential of zero charge, and thermal, zero-point energy correction.

| **Substrate** | **Dopant** | **Adsorbate** |  |  |  |  |  |
| --- | --- | --- | --- | --- | --- | --- | --- |
| Ag | Ag |  | 27.7410 | 0.4992 | 0.002822 | 3.9951 |  |
| CO2 | −7.8844 | 0.5665 | 0.002672 |  |  |
| CO | 3.5047 | 0.5130 | 0.002930 |  |  |
| CO+CO2 | −32.1484 | 0.5691 | 0.002788 |  |  |
| 2CO | −20.6576 | 0.5201 | 0.003201 |  |  |
| OCCO | −20.1920 | 0.5432 | 0.002780 |  |  |
| Ag | Au |  | 25.7404 | 0.5099 | 0.002912 | 4.0998 |  |
| CO2 | −10.3332 | 0.5715 | 0.002847 |  |  |
| CO | 1.4353 | 0.5267 | 0.003018 |  |  |
| CO+CO2 | −34.1277 | 0.5769 | 0.002792 |  |  |
| 2CO | −22.5668 | 0.5403 | 0.003312 |  |  |
| OCCO | −22.2897 | 0.5580 | 0.002849 |  |  |
| Ag | Pd |  | 22.5365 | 0.5093 | 0.003239 | 4.1900 |  |
| CO2 | −14.2427 | 0.5695 | 0.003219 |  |  |
| CO | −3.3954 | 0.5192 | 0.003201 |  |  |
| CO+CO2 | −38.9337 | 0.5784 | 0.002920 |  |  |
| 2CO | −28.1094 | 0.5309 | 0.003214 |  |  |
| OCCO | −25.7210 | 0.5672 | 0.002858 |  |  |
| Au | Ag |  | 0.6366 | 0.6319 | 0.003363 | 4.9046 |  |
| CO2 | −35.0847 | 0.6900 | 0.003290 |  |  |
| CO | −23.8738 | 0.6430 | 0.003517 |  |  |
| CO+CO2 | −59.5416 | 0.6957 | 0.003396 |  |  |
| 2CO | −48.2700 | 0.6417 | 0.003645 |  |  |
| OCCO | −47.4499 | 0.6646 | 0.003248 |  |  |
| Au | Au |  | −0.6633 | 0.6460 | 0.003393 | 5.0331 |  |
| CO2 | −36.2720 | 0.6958 | 0.003239 |  |  |
| CO | −25.4650 | 0.6564 | 0.003598 |  |  |
| CO+CO2 | −61.1184 | 0.6953 | 0.003467 |  |  |
| 2CO | −49.8114 | 0.6586 | 0.003754 |  |  |
| OCCO | −49.2113 | 0.6800 | 0.003308 |  |  |
| Au | Pd |  | −4.1759 | 0.6437 | 0.003675 | 5.1371 |  |
| CO2 | −40.2684 | 0.7001 | 0.003649 |  |  |
| CO | −29.8669 | 0.6571 | 0.003541 |  |  |
| CO+CO2 | −65.4909 | 0.6994 | 0.003394 |  |  |
| 2CO | −55.4574 | 0.6619 | 0.003807 |  |  |
| OCCO | −52.3072 | 0.6932 | 0.003197 |  |  |
| Pd | Ag |  | −53.1506 | 0.5181 | 0.002905 | 4.9673 |  |
| CO2 | −88.8559 | 0.5587 | 0.002782 |  |  |
| CO | −79.3444 | 0.5366 | 0.002984 |  |  |
| CO+CO2 | −114.7396 | 0.6043 | 0.002749 |  |  |
| 2CO | −106.1345 | 0.5414 | 0.003028 |  |  |
| OCCO | −101.2607 | 0.5713 | 0.002603 |  |  |
| Pd | Au |  | −54.8826 | 0.5303 | 0.002957 | 5.0911 |  |
| CO2 | −90.6508 | 0.5812 | 0.002758 |  |  |
| CO | −81.2612 | 0.5456 | 0.003014 |  |  |
| CO+CO2 | −117.2867 | 0.5948 | 0.002902 |  |  |
| 2CO | −107.4385 | 0.5560 | 0.003042 |  |  |
| OCCO | −104.4128 | 0.5684 | 0.002715 |  |  |
| Pd | Pd |  | −57.4655 | 0.5225 | 0.002913 | 5.0226 |  |
| CO2 | −93.9263 | 0.5810 | 0.002800 |  |  |
| CO | −84.8739 | 0.5462 | 0.002925 |  |  |
| CO+CO2 | −121.1224 | 0.5937 | 0.002901 |  |  |
| 2CO | −111.9426 | 0.5624 | 0.003007 |  |  |
| OCCO | −108.1538 | 0.5648 | 0.002709 |  |  |
| Cu | Cu |  | −12.7537 | 0.4007 | 0.002288 | 4.3144 |  |
| CO2 | −48.2563 | 0.4697 | 0.001989 |  | 0.2153 |
| CO | −37.9834 | 0.4205 | 0.002252 |  | 0.1213 |
| CO+CO2 | −73.4346 | 0.4882 | 0.002168 |  | 0.1754 |
| 2CO | −63.1098 | 0.4358 | 0.002317 |  | 0.1363 |
| OCCO | −61.5798 | 0.4544 | 0.002040 |  | 0.2184 |
| H2 |  |  | −7.1678 |  |  |  | -0.0387 |
| CO2 |  |  | −18.5905 |  |  |  | -0.2611 |
| H2O |  |  | −13.1414 |  |  |  | 0.1190 |
| CO |  |  | −12.1322 |  |  |  | -0.3898 |
